# Supplementary material for: 建造プロジェクト管理の知恵 : 「クリスタルハーモニー」の開発・設計で実践したもの( 船を見守るしくみ)
Source: Springer Nature journal article supplement (doi:10.1038/nmeth.4601), 2010-03-10
Supplement: 41592_2018_BFnmeth4601_MOESM16_ESM.xlsx [file 41592_2018_BFnmeth4601_MOESM16_ESM.xlsx]

## Sheet: 13175_matrix.xls
PROTID	GENE	EDEN15_FC_A	EDEN15_FC_B	EDEN15_SP	EDEN15_iREF	EDEN15	EDEN15	Control	Control	Control	Control	Control	Control	CC532	CC533	CC534	CC535	CC536	CC538	CC553	CC554	CC555	CC556	CC557
CELF1	CELF1	37.5	24.46	1	0	33	36	0	0	0	0	0	0	0	1	0	0	0	0	0	0	0	0	0
CELF2	CELF2	4.63	4.23	0.96	0	4	3	0	0	0	0	0	0	0	0	0	0	0	0	0	0	0	0	0
CACNA1C	CACNA1C	3.92	2.49	0.5	0	0	5	0	0	0	0	0	0	0	0	0	0	0	0	0	0	0	0	0
S100A3	S100A3	3.81	2.45	0.5	0	6	0	0	0	0	0	0	0	0	0	0	0	0	0	0	0	0	0	0
TNRC6A	TNRC6A	4.28	1.81	0.5	0	7	0	0	0	0	0	0	0	0	0	0	0	0	0	1	0	0	0	0
HSD17B4	HSD17B4	2.34	1.55	0.5	0	0	3	1	0	0	0	0	0	0	0	0	0	0	0	0	0	0	0	0
ZBTB12	ZBTB12	7.43	3.53	0.5	0	0	11	0	0	0	0	0	0	0	0	0	0	0	0	0	0	0	0	0
DNAJB5	DNAJB5	3.34	2.27	0.5	0	5	0	0	0	0	0	0	0	0	0	0	0	0	0	0	0	0	0	0
KRT82	KRT82	8.03	3.68	0.5	0	15	0	0	0	0	0	0	0	0	0	0	0	0	0	0	0	0	0	0
KRT86	KRT86	11.31	3.29	0.5	0	22	0	0	0	0	0	0	0	0	0	0	0	0	0	0	0	0	0	1
KRT6C	KRT6C	8.97	1.05	0.5	0	17	0	0	0	0	0	0	0	3	3	2	1	1	0	0	1	0	0	2
KRTAP11-1	KRTAP11-1	3.34	2.27	0.5	0	5	0	0	0	0	0	0	0	0	0	0	0	0	0	0	0	0	0	0
CEMP1	CEMP1	3.34	2.27	0.5	0	5	0	0	0	0	0	0	0	0	0	0	0	0	0	0	0	0	0	0
KRTAP4-16	KRTAP4-16	2.87	2.08	0.49	0	4	0	0	0	0	0	0	0	0	0	0	0	0	0	0	0	0	0	0
LOC392793	LOC392793	2.87	2.08	0.49	0	4	0	0	0	0	0	0	0	0	0	0	0	0	0	0	0	0	0	0
ASMT	ASMT	2.87	2.08	0.49	0	4	0	0	0	0	0	0	0	0	0	0	0	0	0	0	0	0	0	0
KRTAP9-9	KRTAP9-9	2.87	2.08	0.49	0	4	0	0	0	0	0	0	0	0	0	0	0	0	0	0	0	0	0	0
KRTAP2-3	KRTAP2-3;KRTAP2...	2.87	2.08	0.49	0	4	0	0	0	0	0	0	0	0	0	0	0	0	0	0	0	0	0	0
KDM5B	KDM5B	2.87	2.08	0.49	0	4	0	0	0	0	0	0	0	0	0	0	0	0	0	0	0	0	0	0
PSG1	PSG1;PSG8	2.87	2.08	0.49	0	4	0	0	0	0	0	0	0	0	0	0	0	0	0	0	0	0	0	0
KRT32	KRT32	4.28	1.01	0.48	0	7	0	0	0	0	0	0	0	1	2	1	0	1	0	1	1	0	1	0
ZNF330	ZNF330	2.88	1.55	0.47	0	6	0	0	0	2	0	0	0	0	0	0	0	0	0	0	0	0	0	0
KIF25	KIF25	2.75	2.03	0.46	0	0	3	0	0	0	0	0	0	0	0	0	0	0	0	0	0	0	0	0
ADRA1A	ADRA1A	2.41	1.87	0.46	0	3	0	0	0	0	0	0	0	0	0	0	0	0	0	0	0	0	0	0
NBPF26	NBPF26	2.41	1.87	0.46	0	3	0	0	0	0	0	0	0	0	0	0	0	0	0	0	0	0	0	0
NEMF	NEMF	2.41	1.87	0.46	0	3	0	0	0	0	0	0	0	0	0	0	0	0	0	0	0	0	0	0
1	A1BG	2.41	1.87	0.46	0	3	0	0	0	0	0	0	0	0	0	0	0	0	0	0	0	0	0	0
FGFR4	FGFR4	4.51	1.08	0.45	0	0	6	0	0	0	0	0	0	0	0	2	0	1	0	1	0	1	1	1
FGFR1	FGFR1	3.81	0.99	0.45	0	6	0	0	0	0	0	0	0	0	0	2	0	1	0	1	0	1	1	1
FUBP3	FUBP3	2.11	1.48	0.43	0	56	23	21	9	25	24	13	15	1	2	2	2	3	5	3	4	2	2	2
VEZF1	VEZF1	1.94	1.27	0.41	0	2	0	0	0	0	0	0	0	0	0	1	0	0	0	0	0	0	0	0
MED12L	MED12L	3.78	1.23	0.41	0	0	12	0	0	0	0	7	0	0	0	0	0	0	0	0	0	0	0	0
RAVER1	RAVER1	2.59	1.73	0.38	0	3	7	3	0	1	2	1	2	1	0	0	0	0	0	1	1	1	0	0
NEB	NEB	2.66	1.01	0.37	0	10	0	0	0	7	0	0	0	0	0	0	0	0	0	0	0	0	0	0
COPS3	COPS3	2.68	0.38	0.37	0	50	0	0	0	50	0	0	0	0	0	3	0	0	0	1	3	0	1	1
KRT6B	KRT6B	2.93	0.52	0.36	0	0	20	0	0	0	7	12	0	4	4	2	1	2	0	0	2	0	0	6
TXNRD1	TXNRD1	2.17	1.76	0.33	0	0	2	0	0	0	0	0	0	0	0	0	0	0	0	0	0	0	0	0
HEATR9	HEATR9	1.94	1.63	0.33	0	2	0	0	0	0	0	0	0	0	0	0	0	0	0	0	0	0	0	0
POMZP3	POMZP3	1.94	1.63	0.33	0	2	0	0	0	0	0	0	0	0	0	0	0	0	0	0	0	0	0	0
SYT15	SYT15	2.17	1.76	0.33	0	0	2	0	0	0	0	0	0	0	0	0	0	0	0	0	0	0	0	0
DLGAP4	DLGAP4	1.94	1.63	0.33	0	2	0	0	0	0	0	0	0	0	0	0	0	0	0	0	0	0	0	0
COL1A1	COL1A1	2.41	1.01	0.33	0	8	0	0	0	6	0	0	0	0	0	0	0	0	0	0	0	0	0	0
KRTAP13-2	KRTAP13-2	1.94	1.63	0.33	0	2	0	0	0	0	0	0	0	0	0	0	0	0	0	0	0	0	0	0
TRAF5	TRAF5	2.17	1.76	0.33	0	0	2	0	0	0	0	0	0	0	0	0	0	0	0	0	0	0	0	0
STRIP1	STRIP1	2.64	1.15	0.31	0	0	5	0	0	3	0	0	0	0	0	0	1	0	0	0	0	0	0	0
RPL29	RPL29	1.62	0.98	0.31	0	62	10	17	19	34	19	7	32	2	3	4	4	3	3	1	2	1	1	3
CSNK1E	CSNK1E	2.21	0.94	0.31	0	0	6	0	0	2	0	2	3	0	0	0	0	0	0	0	0	0	0	0
CHTOP	CHTOP	1.46	0.84	0.27	0	6	0	1	1	1	1	3	3	0	0	1	0	0	0	0	0	0	0	1
HRNR	HRNR	1.67	0.52	0.26	0	15	0	3	0	10	5	0	5	0	0	1	0	0	0	0	0	0	0	4
BCORL1	BCORL1	1.81	0.86	0.25	0	4	0	0	0	0	0	2	2	0	0	0	0	1	0	0	1	0	0	0
ZBTB4	ZBTB4	2.05	1.23	0.24	0	5	1	0	0	0	1	2	3	0	0	0	0	0	0	0	0	0	0	0
C18ORF21	C18orf21	1.99	1.72	0.24	0	5	5	2	1	3	2	2	3	0	0	0	0	0	0	0	0	0	0	0
CDC40	CDC40	1.75	0.97	0.22	0	4	0	0	0	0	0	4	0	0	0	0	0	0	0	0	0	0	0	0
ZIC4	ZIC4	1.84	0.92	0.2	0	5	0	0	0	0	0	1	5	0	0	0	0	0	0	0	0	0	0	0
LARS2	LARS2	1.61	0.87	0.18	0	4	0	0	0	4	0	0	1	0	0	0	0	0	0	0	0	0	0	0
CSF2RB	CSF2RB	1.47	0.83	0.18	0	8	1	2	6	4	1	1	1	0	0	0	0	0	0	0	0	0	0	0
KRT4	KRT4	2.41	0.8	0.18	0	3	0	0	0	0	0	0	0	1	2	0	1	0	0	0	0	0	0	0
TOP1	TOP1	1.83	1.11	0.17	0	15	5	8	9	0	0	6	7	4	3	1	0	0	2	2	1	0	0	0
OBSCN	OBSCN	2.22	1.27	0.17	0	6	7	4	5	0	0	0	7	0	0	0	0	0	0	0	0	0	1	0
ZCCHC17	ZCCHC17	1.6	0.7	0.15	0	0	5	0	0	4	4	0	0	0	0	0	0	0	0	0	0	0	0	0
PPID	PPID	1.57	0.96	0.15	0	3	0	0	0	0	0	0	4	0	0	0	0	0	0	0	0	0	0	0
KRT16	KRT16	2.6	1.57	0.14	0	28	21	2	0	24	7	16	7	3	5	3	1	2	0	1	2	0	3	2
NAA35	NAA35	1.44	0.84	0.14	0	6	1	4	0	0	3	3	2	0	0	1	0	0	0	0	0	0	1	0
SLC26A8	SLC26A8	1.99	1.44	0.13	0	2	2	0	0	1	0	0	3	0	0	0	0	0	0	0	0	0	0	0
DHX37	DHX37	2.75	0.91	0.13	0	0	3	0	0	0	0	0	0	0	0	2	1	0	0	0	1	0	0	1
NSD2	NSD2	1.28	0.48	0.13	0	8	0	0	0	0	3	9	5	0	0	0	0	0	0	0	0	0	0	0
RBMS1	RBMS1	1.36	0.77	0.13	0	4	0	2	0	1	1	0	3	0	0	0	0	0	1	0	0	0	0	0
DCD	DCD	1.33	0.84	0.13	0	3	0	0	0	1	1	2	1	0	0	0	0	0	0	0	0	0	0	0
LRRC59	LRRC59	2.38	1.4	0.13	0	1	3	0	1	1	0	0	0	1	0	1	0	0	0	0	1	0	0	0
JPH1	JPH1	2.46	1.59	0.12	0	4	3	0	0	1	0	2	3	0	1	0	0	0	1	0	1	0	0	1
BYSL	BYSL	1.39	0.96	0.12	0	2	0	0	0	0	0	0	3	0	0	0	0	0	0	0	0	0	0	0
AQP2	AQP2	1.24	0.81	0.12	0	2	0	0	3	0	0	0	0	0	0	0	0	0	0	0	0	0	0	0
FLG2	FLG2	1.27	0.64	0.12	0	5	0	0	2	4	1	0	3	0	0	0	0	0	0	0	0	0	0	0
4	4	1.19	0.35	0.12	0	15	0	0	7	9	0	2	20	0	0	0	0	0	0	0	0	0	0	0
SMIM18	SMIM18	1.42	0.91	0.12	0	0	2	3	0	0	0	0	0	0	0	0	0	0	0	0	0	0	0	0
AURKAIP1	AURKAIP1	1.23	0.48	0.12	0	7	0	8	3	0	0	0	4	0	0	0	0	0	0	0	0	0	0	0
SLC9A3R1	SLC9A3R1	1.38	0.83	0.12	0	6	1	3	2	3	0	5	0	0	0	0	0	0	0	0	0	0	0	0
EML4	EML4	1.52	0.66	0.11	0	6	0	3	0	2	0	0	5	0	0	2	1	0	1	0	2	1	0	1
UPF3B	UPF3B	1.31	0.49	0.11	0	8	0	0	0	0	4	4	9	1	0	0	0	0	0	1	0	0	0	0
GBE1	GBE1	1.26	0.84	0.1	0	2	0	0	0	0	2	0	1	0	0	0	0	0	0	0	0	0	0	0
GKAP1	GKAP1	1.53	0.93	0.1	0	2	0	0	0	0	0	0	2	0	0	1	0	0	0	0	0	0	0	0
UBN2	UBN2	1.17	0.59	0.1	0	6	0	3	0	0	3	3	5	0	0	0	0	1	0	0	0	0	0	0
SRPRA	SRPRA	1.57	0.98	0.1	0	2	3	4	0	4	0	0	0	0	0	0	0	0	0	0	0	0	0	0
DICER1	DICER1	2.09	1.46	0.1	0	4	6	4	3	2	1	0	2	1	0	2	0	0	0	1	1	1	0	0
NGDN	NGDN	1.63	1.14	0.09	0	4	3	1	0	3	2	4	1	0	0	0	0	0	0	0	0	0	0	0
MAPK7	MAPK7	1.68	1.15	0.09	0	3	3	4	1	2	0	0	2	0	0	0	0	0	0	0	0	0	0	0
KRT73	KRT73	1.46	0.65	0.08	0	3	0	0	0	4	0	0	0	0	0	0	0	1	0	0	0	0	0	1
SEC24A	SEC24A	1.49	0.7	0.08	0	3	0	0	0	3	0	0	1	0	1	0	0	0	0	1	0	0	0	0
DMD	DMD	1.17	0.53	0.08	0	0	4	6	0	0	4	0	0	0	0	0	0	0	0	0	0	0	0	0
XRCC1	XRCC1	1.57	0.7	0.08	0	3	0	0	0	0	0	0	4	0	0	0	1	0	0	0	0	0	1	0
NACA	NACA	1.85	1.38	0.08	0	13	25	7	7	9	13	14	14	4	3	3	0	0	5	3	4	0	2	2
AASDHPPT	AASDHPPT	1.26	0.78	0.08	0	6	1	2	0	5	1	3	5	0	0	0	0	0	0	0	0	0	0	0
RRBP1	RRBP1	1.87	1.35	0.07	0	11	7	5	3	4	0	10	6	1	1	0	1	1	0	0	1	0	0	0
EBNA1BP2	EBNA1BP2	1.48	0.61	0.07	0	9	1	4	0	0	0	13	1	2	1	1	0	0	1	0	3	0	0	0
BBS7	BBS7	1.15	0.58	0.07	0	0	3	0	0	0	3	5	0	0	0	0	0	0	0	0	0	0	0	0
CYP11B1	CYP11B1	1.15	0.52	0.06	0	0	4	5	0	0	2	4	0	0	0	0	0	0	0	0	0	0	0	0
DFFA	DFFA	1.21	0.79	0.06	0	2	0	1	0	1	0	0	2	0	0	0	0	0	0	0	0	0	0	0
C1ORF52	C1orf52	1.97	1.13	0.06	0	3	3	0	0	0	0	2	6	0	0	1	1	0	1	0	0	0	0	0
UPF1	UPF1	1.22	0.8	0.06	0	2	0	0	0	0	0	2	2	0	0	0	0	0	0	0	0	0	0	0
CWC22	CWC22	1.39	0.98	0.06	0	4	2	1	0	5	1	2	3	0	0	0	0	0	0	0	0	0	0	0
NDRG3	NDRG3	1.6	1.34	0.06	0	9	6	4	4	4	2	8	5	0	0	0	0	0	1	0	0	0	0	0
ND5	MT-ND5	1.39	0.79	0.06	0	6	3	0	0	0	7	5	6	0	0	0	0	0	0	0	0	0	0	0
BUD31	BUD31	0.97	0.43	0.06	0	8	0	2	5	3	0	9	5	0	0	0	0	0	0	0	0	0	0	0
NCBP3	NCBP3	1.38	0.83	0.05	0	4	2	0	0	3	0	4	6	0	0	0	0	0	0	0	0	0	0	0
NOB1	NOB1	1.33	0.82	0.05	0	3	2	0	0	1	0	7	3	0	0	0	0	0	0	0	0	0	0	0
MCM10	MCM10	1.07	0.51	0.05	0	5	0	2	1	0	0	5	6	0	0	0	1	0	0	0	0	0	0	0
PAFAH1B1	PAFAH1B1	1.41	0.97	0.05	0	2	1	1	0	3	0	0	1	0	0	0	0	0	0	0	0	0	0	0
ALPK1	ALPK1	1.38	0.94	0.05	0	2	1	0	2	2	0	0	1	0	0	0	0	0	0	0	0	0	0	0
GMPPB	GMPPB	1.43	1.07	0.05	0	3	5	0	3	4	3	4	2	0	0	0	0	0	0	0	0	0	0	0
EDF1	EDF1	1.4	0.72	0.05	0	8	2	0	0	5	0	6	11	0	0	0	1	0	1	0	1	0	0	0
AATF	AATF	1.01	0.59	0.05	0	6	0	3	1	3	3	2	5	0	0	0	0	0	0	0	2	0	0	1
NECAP2	NECAP2	1.17	0.64	0.05	0	3	0	1	0	0	0	3	3	0	0	0	0	0	1	0	0	0	0	0
ARPC2	ARPC2	1.26	0.8	0.05	0	11	3	2	5	0	5	8	13	0	0	0	0	0	0	0	0	0	0	0
SUMO3	SUMO3	2.03	1.15	0.04	0	4	3	0	4	0	0	0	4	1	1	0	1	0	1	0	1	0	0	1
WDR72	WDR72	1.26	0.97	0.04	0	4	2	1	4	3	1	2	2	0	0	0	0	0	0	0	0	0	0	0
PCF11	PCF11	1.37	0.74	0.04	0	11	3	7	0	0	2	13	8	1	2	0	0	1	0	0	1	0	0	0
CGN	CGN	0.86	0.51	0.04	0	3	0	0	1	2	5	1	1	0	0	0	0	0	0	0	0	0	0	0
DNTTIP2	DNTTIP2	1.99	0.81	0.03	0	12	3	0	4	4	0	8	4	9	6	0	2	0	1	2	3	1	0	2
R3HDM1	R3HDM1	1.19	0.94	0.03	0	4	2	3	1	3	3	2	2	0	0	0	0	0	0	0	0	0	0	0
SDE2	SDE2	1.06	0.51	0.03	0	3	0	0	0	0	0	3	6	0	0	0	0	1	1	0	0	0	0	0
EFL1	EFL1	1.23	0.88	0.03	0	2	4	3	3	4	3	0	1	0	0	0	0	0	0	0	0	0	0	0
SSB	SSB	1.52	0.85	0.03	0	1	7	6	0	3	2	2	3	0	2	3	2	0	2	0	1	0	0	0
TXLNG	TXLNG	1.16	0.49	0.03	0	8	1	0	0	0	0	10	15	0	0	0	0	0	1	0	0	0	0	2
CACNA1G	CACNA1G	1.08	0.29	0.03	0	0	12	0	20	0	0	0	20	0	0	0	0	0	0	0	0	0	0	1
NDRG1	NDRG1	1.77	0.55	0.03	0	8	0	2	1	3	0	0	5	0	0	3	2	1	4	1	4	1	3	3
RTF1	RTF1	1.9	0.58	0.03	0	0	4	0	4	0	0	0	0	3	1	2	2	0	1	0	0	0	0	1
MYO5C	MYO5C	0.75	0.42	0.03	0	2	0	0	0	0	6	0	3	0	0	0	0	0	0	0	0	0	0	0
IGBP1	IGBP1	1.31	0.55	0.03	0	2	0	0	0	0	0	3	0	1	0	0	0	0	2	0	0	0	0	1
CCDC127	CCDC127	1	0.63	0.03	0	3	1	1	0	3	5	2	0	0	0	0	0	0	0	0	0	0	0	0
NSRP1	NSRP1	1.53	0.53	0.02	0	5	0	0	0	0	0	0	9	1	1	1	1	2	1	1	1	0	0	1
CHAF1B	CHAF1B	1.42	0.52	0.02	0	3	0	0	0	0	0	1	4	0	0	0	0	2	1	0	0	2	1	1
BRD2	BRD2	1.28	0.52	0.02	0	4	0	0	0	0	0	2	7	0	0	2	1	2	0	0	1	0	1	0
CEP97	CEP97	0.81	0.47	0.02	0	2	0	3	2	3	0	0	0	0	0	0	0	0	0	0	0	0	0	0
INCENP	INCENP	1.32	0.62	0.02	0	18	4	10	0	0	1	19	22	1	1	1	2	1	0	0	2	1	1	1
UNK	UNK	1.45	0.97	0.02	0	2	4	3	3	2	2	0	1	0	0	0	0	0	0	1	0	0	2	2
GORASP2	GORASP2	1.1	0.68	0.02	0	1	4	3	0	1	4	2	5	1	0	0	0	0	0	0	0	0	0	0
SMAP	C11orf58	1.63	0.9	0.02	0	18	6	6	4	0	0	14	22	1	1	1	1	1	4	3	2	1	2	2
FAM117B	FAM117B	0.92	0.55	0.02	0	0	3	3	2	1	3	2	0	0	0	0	0	0	0	0	0	0	0	0
RPS10-NUDT3	RPS10-NUDT3	1.46	0.55	0.02	0	4	0	0	3	0	2	0	0	0	0	3	1	0	0	1	1	2	2	1
KIAA1143	KIAA1143	1.42	0.48	0.02	0	5	0	1	0	3	0	1	4	1	0	1	0	1	5	2	0	0	0	0
MAGOH	MAGOH	0.97	0.51	0.02	0	2	0	2	0	0	0	4	0	0	0	0	0	0	0	1	1	0	0	0
GNL3L	GNL3L	1.22	0.87	0.02	0	3	5	3	2	0	5	5	5	0	0	0	0	0	0	0	0	0	0	0
RPS13	RPS13	1.82	0.44	0.02	0	0	10	0	0	10	1	5	1	0	0	8	2	2	0	0	4	0	2	0
RPL32	RPL32	1	0.42	0.02	0	9	0	0	8	8	2	3	4	0	0	2	0	1	0	0	0	1	2	2
PPP4R3A	PPP4R3A	1.44	1.13	0.01	0	8	11	8	2	8	5	7	12	0	0	0	0	0	0	0	0	0	0	0
STAU2	STAU2	0.89	0.47	0.01	0	2	0	1	0	0	0	3	4	1	2	0	0	0	0	0	0	0	0	0
LSM14B	LSM14B	1.3	0.91	0.01	0	9	6	6	2	7	0	9	13	0	0	0	0	0	1	0	0	0	0	0
OTUD4	OTUD4	0.77	0.49	0.01	0	4	0	2	3	1	2	3	6	0	0	0	0	0	0	0	0	0	0	1
GPATCH8	GPATCH8	1.01	0.53	0.01	0	5	0	1	5	3	0	2	3	1	1	2	2	0	0	0	1	0	0	0
SYF2	SYF2	1.15	0.84	0.01	0	7	3	6	0	3	5	5	7	0	0	0	0	0	1	0	1	0	0	0
FUS	FUS	2.76	1.32	0.01	0	14	12	0	2	7	0	0	21	3	2	3	0	0	5	1	6	0	1	2
DHX36	DHX36	0.81	0.44	0.01	0	0	2	0	0	0	0	3	9	0	0	0	0	0	0	0	0	0	0	0
CCDC124	CCDC124	1.33	0.91	0.01	0	9	3	6	2	5	0	5	9	1	1	1	1	0	4	1	0	0	0	0
STX5	STX5	0.7	0.37	0.01	0	0	2	3	0	0	3	6	0	0	0	0	0	0	0	0	0	0	0	0
ZMAT2	ZMAT2	1.11	0.64	0.01	0	3	3	5	0	0	0	6	7	0	0	0	0	0	0	0	0	0	0	0
PRPF31	PRPF31	1.53	0.92	0.01	0	12	44	9	13	33	14	28	26	2	2	1	3	4	0	0	3	1	0	3
IRF2BP2	IRF2BP2	1.18	0.62	0.01	0	8	2	4	0	2	0	8	13	1	0	0	0	0	4	0	0	0	0	0
USP39	USP39	1.02	0.62	0.01	0	2	2	2	0	0	0	9	2	0	0	1	0	0	0	0	1	0	0	0
DNAJA3	DNAJA3	1.21	0.72	0.01	0	2	1	3	0	0	0	1	3	0	0	2	0	0	0	0	2	0	0	0
KPRP	KPRP	0.69	0.39	0.01	0	2	0	0	0	7	0	0	5	0	0	0	0	0	0	0	0	0	0	0
H2AFY	H2AFY	1.1	0.42	0.01	0	9	0	3	6	3	2	0	9	2	2	0	0	0	1	3	3	4	3	3
RABGEF1	RABGEF1	1.18	0.75	0.01	0	4	5	7	1	5	0	8	3	0	0	0	0	0	0	0	0	0	0	0
SALL2	SALL2	1.29	1.03	0.01	0	10	5	4	4	11	5	4	6	0	0	0	0	1	0	0	1	0	0	1
TARDBP	TARDBP	2.18	1.68	0.01	0	21	24	11	8	8	4	13	21	4	3	4	2	4	6	0	6	0	0	5
TAF6L	TAF6L	2.41	0.47	0.01	0	3	0	0	0	0	0	0	0	0	0	5	2	1	0	1	3	1	0	0
GSTCD	GSTCD	0.86	0.52	0.01	0	0	3	1	2	1	1	3	6	0	0	0	0	0	0	0	0	0	0	0
MAGED2	MAGED2	1.27	0.75	0.01	0	13	3	3	7	5	0	10	13	5	2	0	1	1	3	0	1	0	0	2
TAF3	TAF3	1.31	0.57	0.01	0	2	0	0	0	2	0	1	0	1	1	0	0	1	0	0	2	0	0	2
PEA15	PEA15	1	0.67	0.01	0	2	2	4	0	5	0	2	2	0	0	0	0	0	0	0	0	0	0	0
RPL37A	RPL37A	1.25	0.82	0.01	0	4	9	3	5	14	4	2	5	1	0	0	0	0	0	0	0	0	0	0
UBE2Q1	UBE2Q1	1.14	0.98	0	0	36	39	37	19	40	23	43	51	0	0	0	0	0	0	0	0	0	0	0
GTF2F1	GTF2F1	0.59	0.19	0	0	3	0	0	0	5	0	5	11	0	0	14	8	1	3	3	4	1	0	5
HIST1H4A	HIST1H4A;HIST1H...	0.81	0.69	0	0	29	21	28	27	23	23	36	62	9	8	6	20	13	14	12	18	7	7	12
IFT27	IFT27	0.79	0.62	0	0	15	4	12	6	14	10	12	20	0	0	0	0	0	1	0	0	0	0	0
HSPA6	HSPA6	0.77	0.04	0	0	3	0	1	0	3	0	5	5	9	11	26	49	35	43	31	28	34	26	48
CBX4	CBX4	0	0	0	0	0	0	0	0	2	0	0	0	1	0	0	0	1	0	0	2	1	0	0
NELFA	NELFA	1.2	0.73	0	0	9	15	12	0	21	15	0	16	0	2	1	0	0	1	0	0	0	0	0
PSPC1	PSPC1	1.97	0.2	0	0	2	3	0	0	0	0	3	3	1	0	8	9	7	16	7	10	11	9	7
ZCCHC11	ZCCHC11	0	0	0	0	0	0	2	1	4	0	3	0	0	0	1	0	0	0	0	0	0	0	1
NELFE	NELFE	1.4	0.18	0	0	4	0	0	0	0	0	0	8	10	9	7	9	3	10	3	6	2	3	4
RNF114	RNF114	0	0	0	0	0	0	0	0	0	0	1	0	0	0	0	0	0	0	0	0	0	0	0
SRSF11	SRSF11	0	0	0	0	0	0	0	0	5	0	6	0	3	3	5	6	6	5	6	4	6	5	4
SRSF10	SRSF10	1.12	0.4	0	0	1	0	1	0	0	0	0	1	0	0	0	1	2	0	1	1	2	0	2
MFAP1	MFAP1	1.37	1.03	0	0	28	18	24	9	18	5	22	28	9	9	3	3	2	2	0	2	1	0	3
FKBP3	FKBP3	1.26	0.76	0	0	16	7	8	4	5	0	18	24	0	0	1	0	0	0	0	2	0	0	0
SFRS2IP	SFRS2IP	0	0	0	0	0	0	0	2	0	0	0	0	0	0	0	0	0	0	0	0	0	0	0
MKL1	MKL1	0	0	0	0	0	0	0	0	3	2	0	0	8	7	7	6	6	4	2	8	2	2	5
CDC73	CDC73	0.78	0.52	0	0	26	8	25	16	18	4	41	31	11	7	4	1	0	2	4	2	0	1	0
RPL23	RPL23	0	0	0	0	0	0	0	0	3	0	0	0	3	4	9	10	6	7	8	7	7	14	10
ARPIN	ARPIN	0.61	0.34	0	0	1	2	5	0	0	0	7	10	0	0	0	0	0	0	0	0	0	0	0
SMG9	SMG9	1.26	0.5	0	0	1	0	0	0	1	0	0	0	0	0	1	0	0	2	1	1	1	0	0
APBB1	APBB1	0	0	0	0	0	0	1	0	0	3	0	3	0	0	3	0	0	3	3	1	1	0	2
SYNE1	SYNE1	0	0	0	0	0	0	0	7	9	0	0	0	0	0	0	0	1	0	0	0	0	0	0
RPS26	RPS26	0.81	0.64	0	0	4	5	4	3	9	7	7	7	1	1	2	1	5	1	2	5	2	1	5
ZC3H15	ZC3H15	1.06	0.78	0	0	9	9	6	11	8	2	14	14	7	6	1	0	1	1	0	0	1	0	0
ZC3H14	ZC3H14	0	0	0	0	0	0	0	0	2	0	0	0	16	13	2	1	0	12	2	3	0	0	0
FAM122B	FAM122B	0	0	0	0	0	0	0	0	0	0	0	4	0	0	0	0	0	0	0	0	0	0	0
ZC3H18	ZC3H18	1.02	0.25	0	0	2	0	0	0	0	0	4	2	8	2	5	2	4	0	0	0	0	0	0
HBS1L	HBS1L	0.83	0.65	0	0	6	5	7	6	6	3	5	18	5	3	4	2	1	4	2	1	2	2	3
KIAA0415	AP5Z1	0	0	0	0	0	0	0	0	0	0	0	2	0	0	0	0	0	0	0	0	0	0	0
LARP1	LARP1	1.01	0.92	0	0	133	114	128	139	120	107	127	136	43	46	28	30	27	46	34	24	17	21	19
AP1M1	AP1M1	0	0	0	0	0	0	0	7	0	0	0	9	0	0	0	0	0	0	0	0	0	0	0
TCOF1	TCOF1	1.13	0.79	0	0	84	63	72	56	71	38	74	100	70	59	67	85	97	59	27	68	19	17	70
NUP98	NUP98	0.73	0.6	0	0	20	11	29	13	21	21	26	21	13	6	1	1	3	3	0	2	0	0	0
WIPI2	WIPI2	1	0.65	0	0	23	27	28	19	25	30	25	30	3	5	4	13	7	44	11	6	11	13	5
CDK5	CDK5	0	0	0	0	0	0	0	0	1	0	0	0	0	0	3	2	1	0	1	0	1	1	1
WIPI1	WIPI1	0	0	0	0	0	0	2	0	0	0	4	3	1	0	0	0	0	0	0	0	0	0	0
ZNF687	ZNF687	0	0	0	0	0	0	0	0	0	0	0	2	0	1	1	2	3	1	0	4	0	0	2
HSPA8	HSPA8	0.64	0.02	0	0	0	2	4	3	0	3	0	4	56	59	93	122	79	95	63	77	63	56	87
FXR1	FXR1	1.06	0.99	0	0	127	90	96	112	102	86	112	120	0	1	1	1	0	3	0	1	0	0	2
FXR2	FXR2	1.14	1.04	0	0	312	323	273	291	248	260	326	358	0	0	2	0	0	2	0	1	0	1	1
STK3	STK3	0.51	0.34	0	0	0	2	2	3	2	6	2	4	0	0	0	0	1	0	0	1	1	1	0
STK4	STK4	1.47	0.59	0	0	1	0	0	0	0	0	0	0	0	0	0	0	1	1	0	0	1	1	0
DHX29	DHX29	0.84	0.71	0	0	21	24	22	34	25	19	29	43	4	6	17	4	6	8	9	2	3	3	4
CEP85	CEP85	0	0	0	0	0	0	2	0	0	0	0	0	0	0	0	0	0	0	0	0	0	0	0
C9ORF78	C9orf78	0.84	0.45	0	0	1	0	0	0	0	0	3	2	1	2	0	0	0	1	1	0	1	0	0
UBE2Q2	UBE2Q2	0	0	0	0	0	0	0	0	0	0	3	0	0	0	0	0	0	0	0	0	0	0	0
STRBP	STRBP	0.42	0.25	0	0	0	3	5	8	0	5	4	11	1	2	1	0	0	0	0	1	0	0	0
DBNL	DBNL	1.05	0.76	0	0	32	13	10	16	24	12	28	45	3	5	7	5	6	18	1	5	3	5	6
AKAP1	AKAP1	1.05	0.84	0	0	15	7	11	14	6	8	12	11	10	8	4	3	5	4	5	4	4	5	5
GTF2F2	GTF2F2	0.96	0.53	0	0	7	4	10	1	4	0	6	18	2	2	10	7	6	6	4	2	2	1	3
DDX41	DDX41	0.92	0.48	0	0	0	1	0	0	0	0	2	3	0	0	1	1	1	0	1	1	0	0	2
TUBB4B	TUBB4B	0.64	0.14	0	0	4	52	8	65	60	66	40	60	19	24	71	97	78	46	64	67	85	83	82
TUBB4A	TUBB4A	1.47	0.02	0	0	1	0	0	0	0	0	0	0	14	19	52	68	53	43	48	53	69	70	58
DDX42	DDX42	1.38	0.99	0	0	33	21	19	8	16	12	38	30	21	18	19	18	11	12	8	11	4	7	10
SYAP1	SYAP1	0.9	0.24	0	0	1	0	0	0	1	1	0	2	3	2	6	0	1	5	1	1	0	2	1
EIF2A	EIF2A	0.92	0.59	0	0	8	3	4	0	6	4	10	15	4	6	7	0	0	4	1	1	0	0	3
DDX46	DDX46	1.45	0.44	0	0	29	32	29	11	27	6	29	35	49	52	66	85	44	55	33	47	32	42	48
PRR12	PRR12	0	0	0	0	0	0	1	0	0	2	0	0	0	0	0	0	1	0	0	0	0	0	0
ARHGAP17	ARHGAP17	0	0	0	0	0	0	0	0	0	1	0	0	0	0	0	0	0	1	0	1	0	0	0
POP1	POP1	0	0	0	0	0	0	0	0	0	0	0	4	0	0	2	3	0	3	2	1	0	0	1
SNRNP27	SNRNP27	0.71	0.51	0	0	7	3	8	11	7	9	1	7	0	0	0	0	0	0	0	0	0	0	0
TACC3	TACC3	0.94	0.28	0	0	1	0	0	0	1	2	0	0	2	2	2	1	3	2	1	3	4	1	2
COLEC10	COLEC10	0	0	0	0	0	0	0	1	0	0	0	0	0	0	0	0	0	0	0	0	0	0	0
CADPS2	CADPS2	0	0	0	0	0	0	5	0	3	3	0	0	0	0	0	0	0	0	0	0	0	0	0
KLC1	KLC1	2.75	0.14	0	0	0	3	0	0	0	0	0	0	5	5	11	9	5	10	11	8	10	10	11
CTCF	CTCF	0	0	0	0	0	0	0	0	0	0	0	1	4	1	2	0	1	2	1	3	0	1	2
LARP4	LARP4	1.36	1.08	0	0	11	12	9	10	9	3	13	8	3	3	2	0	0	1	1	1	0	0	0
EIF2S2	EIF2S2	0	0	0	0	0	0	0	0	0	0	1	0	3	0	1	0	0	1	0	0	0	1	0
C19ORF43	C19orf43	1.61	0.26	0	0	6	2	0	0	0	0	4	11	6	6	11	16	15	13	8	7	7	6	10
MMP10	MMP10	0	0	0	0	0	0	0	0	0	0	0	1	0	0	0	0	0	0	0	0	0	0	0
HMGN2	HMGN2	0	0	0	0	0	0	0	0	0	0	0	2	0	0	0	1	3	0	0	4	0	0	6
ZHX2	ZHX2	0	0	0	0	0	0	0	0	0	0	1	0	1	0	0	0	0	0	0	0	0	0	0
RRP1B	RRP1B	0.82	0.69	0	0	39	33	42	36	37	30	57	82	1	4	7	6	4	4	1	7	1	3	6
LSM14A	LSM14A	0.95	0.66	0	0	6	6	12	8	5	0	5	11	0	0	1	1	1	1	1	0	0	0	1
NOP2	NOP2	1.02	0.8	0	0	19	11	17	8	9	12	20	26	5	4	2	2	2	0	1	10	2	2	5
PDS5A	PDS5A	0.61	0.3	0	0	3	0	2	0	3	5	6	1	3	3	6	4	2	1	2	3	1	1	3
RC3H1	RC3H1	0	0	0	0	0	0	131	122	0	0	0	0	0	0	0	0	0	0	0	0	0	0	0
EDC3	EDC3	0.84	0.65	0	0	14	20	26	15	16	13	32	32	0	0	0	0	0	1	1	1	0	0	0
PUM1	PUM1	0.42	0.24	0	0	20	8	31	21	72	63	0	8	0	0	0	0	0	0	1	0	0	0	1
KRR1	KRR1	0	0	0	0	0	0	0	0	0	0	0	1	0	0	0	1	0	0	0	0	0	0	0
POLR1E	POLR1E	0	0	0	0	0	0	0	0	0	0	2	0	0	1	0	0	0	0	0	0	0	0	0
STIP1	STIP1	0.97	0.72	0	0	6	3	1	6	4	3	7	8	1	0	0	0	0	3	0	2	0	0	0
GPRASP2	GPRASP2	0.45	0.3	0	0	3	0	4	2	2	4	7	8	0	0	0	0	0	0	0	0	0	0	0
WDR75	WDR75	0	0	0	0	0	0	1	0	0	0	0	0	0	0	0	0	0	0	0	0	0	0	0
LARP5	LARP5	1.47	1.35	0	0	1	0	0	0	0	0	0	0	0	0	0	0	0	0	0	0	0	0	0
CCT8	CCT8	0.86	0.26	0	0	56	53	76	80	74	87	23	38	39	52	133	202	101	200	118	86	126	115	109
RPL7A	RPL7A	0.79	0.38	0	0	4	6	7	2	7	9	5	13	1	1	17	15	10	9	7	11	8	10	11
WDR44	WDR44	0	0	0	0	0	0	0	0	0	1	0	0	1	1	4	5	4	5	3	3	2	2	5
CSDE1	CSDE1	0.77	0.7	0	0	107	80	128	139	119	93	128	150	20	18	22	11	8	17	18	5	13	6	17
FARSB	FARSB	1.47	0.68	0	0	1	0	0	0	0	0	0	0	0	0	0	1	0	1	0	1	0	0	0
CCT2	CCT2	0	0	0	0	0	0	2	0	2	2	0	0	1	1	93	68	90	7	97	54	242	219	85
MCRIP2	MCRIP2	0.45	0.33	0	0	0	1	4	0	4	1	3	4	0	0	0	0	0	0	0	0	0	0	0
ZNF318	ZNF318	1.09	0.07	0	0	0	3	0	0	2	0	5	3	9	4	9	22	26	10	6	30	11	7	27
PALLD	PALLD	0	0	0	0	0	0	0	0	2	0	2	0	1	3	1	0	0	5	0	0	0	0	0
CCT4	CCT4	0	0	0	0	0	0	4	0	0	1	0	0	2	2	46	49	63	15	54	29	86	91	48
CCT5	CCT5	0.67	0.01	0	0	0	2	2	1	6	0	3	2	2	1	66	51	58	11	58	38	119	99	65
TTK	TTK	1.91	0.42	0	0	4	1	0	1	3	0	0	1	8	6	2	0	0	1	2	1	2	0	4
AHSA1	AHSA1	0.6	0.25	0	0	4	0	3	0	3	3	8	7	7	6	7	2	3	2	6	6	4	5	3
ALDH16A1	ALDH16A1	0	0	0	0	0	0	0	0	0	1	0	0	0	0	0	0	0	0	0	0	0	0	0
RSBN1L	RSBN1L	1.14	1.04	0	0	81	62	65	50	53	60	77	85	8	4	0	0	2	1	0	0	2	0	0
TMEM263	TMEM263	0	0	0	0	0	0	0	1	0	0	0	0	0	0	0	0	0	0	0	0	0	0	0
H3F3A	H3F3A;H3F3B	1.1	0.64	0	0	5	3	5	5	0	4	3	4	5	3	3	7	3	5	3	7	2	1	4
SRFBP1	SRFBP1	0	0	0	0	0	0	0	0	0	0	3	2	0	0	0	0	0	0	0	0	0	0	0
MYBBP1A	MYBBP1A	1.07	0.99	0	0	119	133	109	101	129	130	124	149	8	3	39	22	31	12	7	51	6	6	27
HMMR	HMMR	0	0	0	0	0	0	0	0	1	0	7	7	0	0	0	0	0	0	0	0	0	0	0
PDLIM5	PDLIM5	0.95	0.34	0	0	7	2	7	1	1	1	6	15	7	5	9	3	2	15	7	4	6	5	3
PDLIM7	PDLIM7	0	0	0	0	0	0	3	1	1	0	4	7	6	2	0	0	0	0	0	0	0	0	0
PDLIM1	PDLIM1	1.07	1	0	0	49	46	43	41	41	42	48	66	3	2	13	12	4	18	8	6	4	6	8
CCDC59	CCDC59	1.47	1.35	0	0	1	0	0	0	0	0	0	0	0	0	0	0	0	0	0	0	0	0	0
DST	DST	0.98	0.19	0	0	0	7	0	0	15	0	11	0	0	0	10	4	7	3	12	3	6	11	11
DSP	DSP	0.74	0.14	0	0	1	0	1	0	5	0	0	0	1	0	5	1	1	0	12	2	4	3	4
ALYREF	ALYREF	1.97	0.61	0	0	8	3	5	2	0	1	2	4	0	0	3	2	1	3	2	9	8	4	4
BLM	BLM	0.48	0.22	0	0	4	0	4	0	3	0	13	13	4	0	5	2	3	1	0	5	0	0	3
PPP1R10	PPP1R10	1.21	0.33	0	0	24	16	11	12	18	11	27	24	22	23	76	39	48	32	41	52	27	25	37
ZNF37A	ZNF37A	0	0	0	0	0	0	1	0	0	0	0	0	0	0	0	0	0	0	0	0	0	0	0
HIST2H3A	HIST2H3A;HIST2H...	0.76	0.45	0	0	6	3	17	6	0	3	6	5	5	4	3	8	3	5	5	8	3	1	6
PYM1	PYM1	0.96	0.8	0	0	25	20	14	22	28	16	34	36	0	0	0	0	0	0	0	0	0	0	0
HCK	HCK	0	0	0	0	0	0	0	0	0	4	0	0	0	0	2	0	1	0	1	0	1	1	1
GART	GART	0.42	0.05	0	0	1	0	0	5	4	2	0	4	0	1	19	11	18	11	22	15	13	22	19
RPRD2	RPRD2	0	0	0	0	0	0	0	0	3	3	0	0	20	20	9	18	14	4	13	13	9	7	5
NUFIP2	NUFIP2	0.86	0.76	0	0	104	68	104	113	113	81	84	119	31	28	20	17	8	20	14	10	11	10	20
BNIP1	BNIP1	0	0	0	0	0	0	1	0	3	0	0	0	0	0	0	0	0	0	0	0	0	0	0
MCCC1	MCCC1	0.84	0.25	0	0	57	80	93	113	94	138	25	24	66	57	182	272	189	43	62	148	128	223	211
PDAP1	PDAP1	1.09	0.89	0	0	16	12	10	9	17	10	13	22	9	5	8	8	4	12	4	5	3	2	4
GATAD2A	GATAD2A	0	0	0	0	0	0	0	1	0	0	0	0	5	5	10	9	10	3	4	10	2	3	7
PSIP1	PSIP1	0.71	0.32	0	0	1	4	6	0	0	4	10	7	10	7	2	3	3	3	5	8	4	4	5
EMD	EMD	1.3	0.14	0	0	1	0	0	0	0	0	0	1	7	12	3	7	1	6	1	5	1	1	4
SPDL1	SPDL1	0	0	0	0	0	0	1	0	0	0	3	0	3	3	1	3	1	1	5	0	0	0	1
SH3D19	SH3D19	0	0	0	0	0	0	0	2	0	0	0	5	1	0	0	0	0	1	0	0	0	0	0
PTF1A	PTF1A	0.98	0.72	0	0	1	0	0	0	1	1	0	1	0	0	0	0	0	0	0	0	0	0	0
DNAJC7	DNAJC7	0.73	0.63	0	0	9	5	10	4	11	10	11	16	0	0	1	0	0	0	0	0	0	0	0
ZC3H4	ZC3H4	1.41	1.02	0	0	21	16	8	6	12	7	24	27	9	3	5	3	5	4	6	8	3	2	6
PSMD12	PSMD12	0.72	0.5	0	0	2	1	5	2	2	4	0	1	1	1	2	1	0	1	1	1	0	1	0
KRT17	KRT17	0	0	0	0	0	0	0	0	0	3	0	0	14	13	3	0	1	0	1	1	0	2	1
KRT14	KRT14	1.25	0.77	0	0	64	29	18	19	107	35	7	39	4	6	3	1	2	0	1	2	0	3	2
KRT13	KRT13	1.47	0.35	0	0	1	0	0	0	0	0	0	0	2	4	1	0	2	0	1	1	0	1	0
ASAP2	ASAP2	1.05	0.79	0	0	1	0	0	0	0	2	0	0	0	0	0	0	0	0	0	0	0	0	0
KRT10	KRT10	0.91	0.74	0	0	231	189	186	241	312	256	171	258	16	25	10	5	5	3	3	6	0	3	4
RRP12	RRP12	1.03	0.65	0	0	5	16	0	10	14	15	11	18	0	0	2	0	2	0	0	4	0	1	4
FLNA	FLNA	0.54	0	0	0	0	6	8	7	10	13	0	3	1970	1936	812	878	400	439	434	591	431	427	614
FLNB	FLNB	0	0	0	0	0	0	0	0	0	0	5	0	267	269	146	82	74	30	71	85	64	64	92
ATXN2	ATXN2	0.91	0.62	0	0	17	7	23	9	17	4	8	21	3	2	2	3	1	3	1	2	3	2	4
SMAP1	SMAP1	0	0	0	0	0	0	0	0	2	0	0	3	1	2	3	0	0	2	0	0	0	0	0
FOXC1	FOXC1	1.24	0.54	0	0	2	0	0	0	0	0	1	3	0	0	1	1	1	1	2	1	0	1	1
RRP15	RRP15	0.88	0.29	0	0	1	0	0	0	0	0	0	5	2	2	0	0	2	0	0	1	0	0	5
MYH14	MYH14	0.52	0.25	0	0	5	0	8	6	5	7	4	0	2	1	4	2	4	0	7	7	4	2	4
GIGYF1	GIGYF1	0	0	0	0	0	0	0	0	1	0	0	0	0	0	0	0	0	0	0	0	0	0	0
GIGYF2	GIGYF2	0.94	0.42	0	0	31	17	28	26	26	24	30	19	74	47	35	27	25	13	25	30	17	13	29
KIF23	KIF23	0	0	0	0	0	0	0	0	0	0	2	1	2	2	12	14	14	4	3	19	0	2	11
C5ORF22	C5orf22	0	0	0	0	0	0	3	1	0	0	0	0	0	0	0	0	0	0	0	0	0	0	0
VAPB	VAPB	0	0	0	0	0	0	0	0	0	0	0	2	3	2	3	0	0	1	1	3	1	1	1
AKAP9	AKAP9	0	0	0	0	0	0	0	0	2	0	0	0	0	0	0	0	0	0	0	0	0	0	0
SART3	SART3	0.9	0.73	0	0	68	53	81	67	77	83	37	62	19	13	34	30	21	14	10	33	6	6	19
EFHD1	EFHD1	0	0	0	0	0	0	0	0	1	0	0	0	1	3	0	1	0	5	2	2	2	3	2
AKAP12	AKAP12	2.41	0.14	0	0	3	0	0	0	0	0	0	0	12	10	8	7	10	6	4	14	1	1	9
TAF15	TAF15	0.77	0.44	0	0	3	4	5	0	0	7	12	7	2	1	1	1	1	7	0	2	0	1	1
TRIM47	TRIM47	0.49	0.3	0	0	1	0	4	0	0	4	3	0	0	0	0	0	0	0	0	0	0	0	0
DKFZP686E2459	DKFZP686E2459	0	0	0	0	0	0	0	0	0	0	0	12	0	0	0	0	0	0	0	0	0	0	0
HINT1	HINT1	0	0	0	0	0	0	2	0	1	0	0	0	0	0	0	1	0	1	0	1	1	0	1
EXOSC10	EXOSC10	1.22	0.73	0	0	22	13	9	6	10	8	18	43	13	12	16	22	13	6	7	9	10	11	12
NCOA6	NCOA6	0.67	0.42	0	0	3	0	5	0	2	2	3	4	2	2	1	3	1	1	1	2	1	1	2
POLR2M	POLR2M	0	0	0	0	0	0	1	0	0	0	0	0	0	0	0	0	0	0	0	0	0	0	0
SLC30A10	SLC30A10	0.61	0.49	0	0	1	1	1	2	4	3	1	3	0	0	0	0	0	0	0	0	0	0	0
ARF1	ARF1	0	0	0	0	0	0	0	0	0	4	0	0	7	3	17	9	5	5	6	8	1	2	4
PLRG1	PLRG1	1.06	0.57	0	0	16	3	8	3	7	0	11	29	0	0	0	2	2	2	1	2	1	0	3
ZC3H13	ZC3H13	0	0	0	0	0	0	0	0	0	0	6	6	1	0	0	0	0	0	0	0	0	0	0
CDC37	CDC37	0.82	0.43	0	0	6	0	4	1	2	3	8	4	2	0	2	2	0	3	1	2	1	1	2
PRDX6	PRDX6	0	0	0	0	0	0	1	0	0	0	4	2	6	8	2	3	2	7	4	6	2	5	1
RBM12	RBM12	1.1	0.81	0	0	11	9	11	6	8	2	15	17	0	0	0	0	0	0	0	0	0	0	0
RBM10	RBM10	1.58	0.85	0	0	11	16	7	6	14	9	15	0	16	14	10	7	5	12	8	7	2	4	4
RBM17	RBM17	1.6	0.91	0	0	18	5	5	6	4	3	11	13	9	7	12	9	9	8	5	9	6	3	7
PTPMT1	PTPMT1	0	0	0	0	0	0	0	4	0	0	0	1	0	0	0	0	0	0	0	0	0	0	0
RBM14	RBM14;RBM14-RBM...	0.66	0.21	0	0	3	0	2	4	0	0	4	7	0	0	5	6	8	0	0	5	0	0	9
LIMD1	LIMD1	0.94	0.64	0	0	18	9	19	5	7	9	27	23	1	0	3	1	0	4	2	1	1	0	0
C1ORF198	C1orf198	0	0	0	0	0	0	0	0	0	0	0	2	1	1	0	1	0	3	0	0	0	0	0
HMGB1	HMGB1	0	0	0	0	0	0	0	0	0	0	0	2	1	1	1	0	0	1	2	6	0	1	3
ENSA	ENSA	1.09	0.72	0	0	12	10	3	3	8	6	24	23	0	0	0	0	0	4	0	0	0	0	0
RIF1	RIF1	1.18	0.43	0	0	10	12	14	0	9	11	9	17	5	2	10	22	23	11	7	29	8	9	23
EIF4ENIF1	EIF4ENIF1	0	0	0	0	0	0	4	0	0	0	0	0	0	0	2	0	0	1	2	1	0	2	1
AIMP2	AIMP2	0	0	0	0	0	0	1	2	1	4	1	3	1	1	1	0	3	0	0	1	0	0	0
CLINT1	CLINT1	1.56	0.17	0	0	5	1	0	0	4	3	0	2	15	16	20	9	9	18	11	9	5	7	8
NASP	NASP	0.82	0.12	0	0	5	6	13	8	9	10	1	0	33	34	44	51	41	53	36	41	32	32	38
SCAF4	SCAF4	0.95	0.4	0	0	2	1	1	0	0	3	3	3	0	0	3	6	2	2	4	4	0	0	2
RGPD3	RGPD3	1.14	0.15	0	0	8	5	6	7	9	5	0	7	33	37	34	49	29	18	11	46	15	14	49
TNKS1BP1	TNKS1BP1	1.69	0.51	0	0	6	3	0	1	8	2	0	3	11	8	0	0	1	0	0	0	0	0	1
NOL8	NOL8	1.06	0.83	0	0	32	27	28	18	22	17	37	60	17	12	2	2	1	0	1	2	0	0	1
RGPD8	RGPD8	0	0	0	0	0	0	0	0	0	1	0	0	24	24	27	37	23	12	6	39	9	9	41
TTF1	TTF1	0	0	0	0	0	0	0	0	0	0	0	1	0	0	0	0	0	0	0	0	0	0	0
C12ORF77	C12orf77	0	0	0	0	0	0	0	0	1	0	0	0	0	0	0	0	0	0	0	0	0	0	0
RAB11FIP2	RAB11FIP2	0	0	0	0	0	0	0	0	0	0	2	0	1	1	0	1	0	2	0	1	1	1	1
RAB11FIP1	RAB11FIP1	0	0	0	0	0	0	2	0	0	0	0	5	4	1	1	4	1	2	0	1	1	1	2
ZNF638	ZNF638	0.95	0.72	0	0	28	17	31	17	13	14	26	50	22	12	11	7	15	1	3	19	4	4	12
LTV1	LTV1	0.63	0.35	0	0	6	0	6	5	5	2	5	8	0	1	0	0	3	6	2	1	1	3	1
MICALL1	MICALL1	1.13	0.7	0	0	4	4	5	1	0	1	8	8	0	0	0	1	0	1	0	0	0	0	0
AFDN	AFDN	0.91	0.76	0	0	59	39	57	34	48	41	60	102	0	0	0	0	0	0	0	0	0	0	0
TBCB	TBCB	1	0.8	0	0	15	14	15	6	12	19	16	24	1	0	2	0	5	3	0	2	0	0	3
GEMIN5	GEMIN5	0.34	0.03	0	0	2	0	2	3	3	2	12	8	43	42	63	44	42	32	27	25	32	22	37
PINX1	PINX1	0	0	0	0	0	0	0	0	0	0	3	1	0	0	0	0	0	0	0	0	0	0	0
UBFD1	UBFD1	0	0	0	0	0	0	1	0	0	0	1	2	0	0	0	0	0	2	1	0	0	0	0
TP53	TP53	0.99	0.05	0	0	1	0	0	0	0	0	3	0	0	0	5	29	20	3	6	25	6	6	31
MARS	MARS	0	0	0	0	0	0	0	0	2	0	0	0	0	1	9	12	11	10	6	9	12	9	10
SARS	SARS	0.98	0.68	0	0	4	4	9	0	4	3	7	3	0	0	0	0	0	0	0	0	0	0	0
IFNA14	IFNA14	0	0	0	0	0	0	0	0	0	0	0	1	0	0	0	0	0	0	0	0	0	0	0
RBM6	RBM6	0.64	0.33	0	0	0	2	0	2	0	0	6	8	0	0	0	0	0	0	0	0	0	0	0
CTTN	CTTN	1.07	0.98	0	0	131	95	92	97	129	80	107	155	46	45	41	51	43	84	23	30	21	27	40
RPL23A	RPL23A	1.08	0.96	0	0	27	21	28	23	23	19	19	24	0	1	8	4	4	9	3	8	3	1	6
DHX9	DHX9	1.16	0.69	0	0	25	30	31	22	23	20	31	22	36	33	17	26	16	36	18	25	12	22	27
LARP1B	LARP1B	0.43	0.28	0	0	0	2	6	5	1	3	5	4	4	4	5	4	0	4	4	1	1	2	0
EEF1A1	EEF1A1	1.08	0.34	0	0	79	74	73	55	79	72	87	75	51	62	73	71	53	108	127	49	158	187	80
CHMP4B	CHMP4B	0.95	0.45	0	0	16	1	11	3	15	2	9	14	2	2	2	2	0	6	0	1	1	2	2
FLAD1	FLAD1	0	0	0	0	0	0	0	0	0	0	3	0	0	0	0	0	0	0	0	1	0	0	0
CCDC7	CCDC7	0	0	0	0	0	0	0	3	0	0	0	0	0	0	0	0	0	0	0	0	0	0	0
CHAF1A	CHAF1A	0	0	0	0	0	0	0	0	0	0	5	0	1	1	0	0	0	0	0	0	1	0	0
PDDC1	PDDC1	0	0	0	0	0	0	0	0	0	0	1	0	0	0	0	0	0	0	0	0	0	0	0
CPSF7	CPSF7	1.12	0.39	0	0	0	3	3	0	0	2	0	4	0	1	4	2	0	3	4	1	1	3	1
CPSF6	CPSF6	0.99	0.63	0	0	12	8	13	5	18	5	8	15	3	4	5	7	13	13	6	9	7	3	9
PRC1	PRC1	0	0	0	0	0	0	0	0	0	0	4	0	1	0	1	0	0	0	0	1	0	0	0
ERH	ERH	1.11	0.2	0	0	0	1	0	0	0	0	1	2	2	1	4	6	5	3	0	8	2	2	3
CENPF	CENPF	0	0	0	0	0	0	0	0	0	0	2	0	0	0	0	0	1	0	0	0	0	0	0
CSNK2B	CSNK2B	0	0	0	0	0	0	1	0	0	0	3	0	0	0	1	1	0	1	1	2	0	0	0
CAD	CAD	3.34	0.25	0	0	0	4	0	0	0	0	0	0	0	0	8	3	6	0	3	4	7	3	7
FRG1	FRG1	1.08	0.66	0	0	5	5	2	1	5	0	14	9	1	0	0	0	0	0	0	0	0	0	0
DDX17	DDX17	1.09	0.22	0	0	33	0	12	0	30	7	0	44	3	3	7	6	5	8	5	14	1	6	8
SNRPD2	SNRPD2	1.22	0.24	0	0	1	0	0	0	0	1	0	0	3	3	2	4	5	2	3	2	3	2	1
DDX10	DDX10	1.26	0.91	0	0	35	29	22	23	20	14	32	53	31	29	19	13	12	6	5	16	7	7	10
CDK12	CDK12	0.99	0.7	0	0	27	28	35	13	21	13	42	60	8	6	6	2	6	1	4	5	3	2	4
UBTF	UBTF	0.74	0.42	0	0	0	1	0	4	0	0	0	3	1	0	0	0	0	0	0	0	0	0	0
NUDC	NUDC	1.05	0.8	0	0	39	18	21	27	27	10	44	40	8	6	24	21	13	21	6	22	5	5	13
ESYT1	ESYT1	1.39	0.12	0	0	3	0	0	0	2	2	0	0	16	11	10	4	2	13	5	3	4	2	4
DDX18	DDX18	1.32	1.02	0	0	31	43	25	19	22	20	45	54	3	4	4	1	3	1	1	6	0	3	4
CDCA2	CDCA2	0.66	0.18	0	0	5	0	6	0	1	0	11	8	12	12	3	1	2	1	1	3	0	0	2
RAI1	RAI1	1.21	0.96	0	0	15	7	7	5	11	6	10	17	2	0	0	1	0	0	0	3	1	2	5
YLPM1	YLPM1	1.33	0.8	0	0	20	15	14	15	12	11	13	14	13	18	19	16	17	14	13	25	6	6	18
TOX4	TOX4	0.64	0.05	0	0	1	0	0	0	3	2	1	2	24	27	17	25	16	24	13	20	8	13	13
RPL22	RPL22	0.73	0.51	0	0	2	4	3	3	4	6	8	5	4	4	2	6	4	1	2	4	3	3	4
FIP1L1	FIP1L1	1.16	1.06	0	0	39	43	32	32	38	28	43	54	3	3	10	13	9	12	6	8	5	5	10
POTEE	POTEE	0	0	0	0	0	0	0	0	0	7	0	15	11	11	13	18	20	15	8	21	3	4	16
APOL4	APOL4	0	0	0	0	0	0	0	0	0	17	0	0	0	0	0	0	0	0	0	0	0	0	0
FGFR2	FGFR2	0	0	0	0	0	0	0	8	0	0	0	6	0	0	2	0	1	0	1	0	1	1	1
PPP2R5D	PPP2R5D	0	0	0	0	0	0	2	0	0	3	4	3	0	0	3	1	0	3	1	1	2	1	1
RNMT	RNMT	0	0	0	0	0	0	0	0	0	0	3	0	0	0	0	0	0	0	0	1	0	0	0
NFX1	NFX1	0	0	0	0	0	0	2	0	0	0	3	0	0	0	0	0	0	1	0	0	0	0	0
RTN4	RTN4	1.22	0.83	0	0	9	14	9	11	8	14	9	6	10	10	7	8	2	11	0	4	2	0	3
TLDC1	TLDC1	0	0	0	0	0	0	0	0	0	3	0	0	0	0	0	0	0	0	0	0	0	0	0
NOLC1	NOLC1	1.12	0.93	0	0	61	41	38	34	55	27	52	83	15	16	22	8	10	5	6	11	9	7	14
MDC1	MDC1	0.95	0.63	0	0	47	20	55	33	20	41	25	33	36	24	9	22	24	34	25	46	23	24	33
RSF1	RSF1	0	0	0	0	0	0	3	0	1	0	0	0	8	6	0	0	0	1	0	0	1	2	0
ASCC3	ASCC3	0	0	0	0	0	0	0	0	0	0	5	0	2	2	8	1	2	2	3	1	2	3	2
FGFR1OP	FGFR1OP	0	0	0	0	0	0	4	6	3	0	1	0	0	0	2	0	0	0	0	0	0	0	0
ALOX12B	ALOX12B	0	0	0	0	0	0	0	0	1	0	0	0	0	0	0	0	0	0	0	0	0	0	0
ENO1	ENO1	0	0	0	0	0	0	0	0	1	1	1	0	3	5	18	26	12	75	28	40	4	15	11
SPATS2	SPATS2	0	0	0	0	0	0	0	0	0	0	0	1	1	0	0	0	0	1	0	0	0	0	0
RPS27A	RPS27A;UBA52	0.73	0.68	0	0	6	4	6	7	9	6	8	8	0	0	1	0	0	1	0	2	0	0	2
RBM26	RBM26	0.76	0.54	0	0	19	9	20	11	17	8	29	34	15	20	18	22	8	10	6	19	0	3	11
ZFP91	ZFP91	0	0	0	0	0	0	0	0	0	0	0	1	1	2	1	0	0	0	0	0	0	0	0
CHORDC1	CHORDC1	0	0	0	0	0	0	2	0	4	0	3	4	1	4	0	0	0	1	0	0	0	0	0
NAF1	NAF1;TNIP1	1.58	0.58	0	0	0	1	0	0	0	0	0	0	1	0	2	0	0	1	1	1	0	1	0
IWS1	IWS1	0	0	0	0	0	0	0	0	0	0	2	0	0	0	0	0	0	0	0	0	0	0	0
SNW1	SNW1	1.19	0.99	0	0	48	28	27	23	28	22	45	56	19	16	3	7	2	5	3	3	2	3	4
NCK2	NCK2	0	0	0	0	0	0	0	3	0	0	2	4	0	0	0	0	0	1	0	0	0	0	0
RPL15	RPL15	0	0	0	0	0	0	4	0	0	0	0	1	7	10	20	20	17	15	10	30	14	11	20
PRCC	PRCC	1.05	0.78	0	0	22	23	15	11	23	13	41	37	1	2	2	1	0	2	0	2	1	0	0
SLU7	SLU7	1.02	0.77	0	0	24	10	11	11	12	13	21	36	7	7	1	5	0	4	2	1	0	0	2
ATG3	ATG3	0	0	0	0	0	0	0	0	0	0	1	0	0	0	0	0	0	0	0	0	0	0	0
ANK3	ANK3	0.5	0.28	0	0	0	3	0	6	3	7	6	4	0	0	1	1	4	2	0	2	0	2	1
NCL	NCL	1.2	1.05	0	0	113	146	96	119	100	108	123	140	44	44	47	58	70	20	29	57	34	37	67
NAP1L1	NAP1L1	0.84	0.65	0	0	16	12	18	10	10	18	18	33	5	6	20	13	8	15	14	8	12	11	14
WDR70	WDR70	0	0	0	0	0	0	1	0	2	0	0	8	6	3	6	5	3	9	3	2	2	4	3
FAM193B	FAM193B	1.05	0.79	0	0	1	0	0	0	0	0	0	3	0	0	0	0	0	0	0	0	0	0	0
STAM2	STAM2	0	0	0	0	0	0	0	2	0	0	0	0	0	1	1	0	0	2	2	0	0	1	1
EEF2	EEF2	0.74	0.64	0	0	36	44	45	54	51	64	63	67	18	29	18	3	5	20	16	26	8	7	8
BRD9	BRD9	0	0	0	0	0	0	0	0	0	0	0	1	0	0	0	0	0	0	0	0	0	0	0
RPN1	RPN1	0	0	0	0	0	0	0	0	0	2	0	0	3	0	2	0	4	5	0	2	0	0	0
RPL26	RPL26	1.32	0.71	0	0	7	6	5	0	12	2	3	9	0	0	11	4	6	4	2	4	1	2	2
COL11A2	COL11A2	0	0	0	0	0	0	0	4	0	0	0	0	0	0	0	0	0	0	0	0	0	0	0
AHCTF1	AHCTF1	1.15	0.11	0	0	17	3	10	5	4	9	9	13	86	83	9	15	16	16	5	55	7	7	31
PABPC1	PABPC1	0.74	0.12	0	0	0	2	0	0	0	6	2	3	6	8	16	13	12	7	11	13	9	9	12
RPL21	RPL21	0.51	0.18	0	0	0	2	1	0	6	1	7	6	1	2	7	9	7	9	5	4	3	2	8
RDBP	RDBP	0	0	0	0	0	0	0	0	0	0	6	0	0	0	0	0	0	0	0	0	0	0	0
SF1	SF1	1.11	1.01	0	0	66	55	63	42	51	50	58	77	16	11	7	8	4	14	6	8	3	5	7
CSK	CSK	0	0	0	0	0	0	0	0	1	0	0	0	0	0	0	0	0	0	0	0	0	0	0
PES1	PES1	0.98	0.26	0	0	7	2	2	2	4	4	9	7	19	22	5	6	4	3	3	5	1	1	3
TNRC6B	TNRC6B	1.21	1.11	0	0	36	25	26	26	29	18	25	31	5	1	6	2	2	6	3	2	0	5	3
BUB1B	BUB1B	0	0	0	0	0	0	0	0	2	0	0	0	6	6	10	2	1	10	9	3	2	2	7
NUDT21	NUDT21	1.3	0.86	0	0	21	24	16	23	18	23	0	26	8	8	14	16	8	15	19	15	8	9	11
TLN1	TLN1	0.93	0.89	0	0	154	105	136	124	160	126	145	169	22	22	41	22	11	41	41	31	21	33	16
GNL3	GNL3	1.08	0.95	0	0	129	113	100	146	92	101	112	143	3	4	2	8	5	6	4	10	3	4	2
GNL2	GNL2	0.63	0.09	0	0	9	0	4	5	0	0	10	31	34	32	10	14	9	8	11	14	8	4	9
EIF3J	EIF3J	0.97	0.73	0	0	7	7	9	9	4	3	12	9	0	1	0	0	0	0	0	0	0	0	0
LBR	LBR	0	0	0	0	0	0	1	0	3	4	8	10	8	11	20	24	21	9	12	16	9	6	18
FBXO5	FBXO5	1.11	0.86	0	0	1	0	0	0	0	0	2	0	0	0	0	0	0	0	0	0	0	0	0
RPLP0P6	RPLP0P6	0	0	0	0	0	0	0	0	0	0	0	1	0	0	0	0	0	0	0	0	0	0	0
STAT3	STAT3	1.98	0.23	0	0	3	5	2	0	0	3	3	2	15	25	7	1	0	15	9	1	3	8	2
RAN	RAN	1.1	0.28	0	0	18	5	13	0	17	4	6	26	11	12	40	37	30	29	14	23	14	15	25
EIF3A	EIF3A	0.81	0.63	0	0	35	13	41	32	29	21	27	25	2	1	17	16	20	5	12	22	13	6	26
EIF3D	EIF3D	0.93	0.62	0	0	18	13	11	5	20	6	34	34	1	1	2	1	7	3	6	6	10	9	7
SKA3	SKA3	0.72	0.09	0	0	1	0	1	0	0	0	3	3	0	3	10	5	4	16	11	7	7	6	9
STRAP	STRAP	0.84	0.67	0	0	22	27	29	41	26	17	36	38	0	1	21	20	12	27	14	13	9	9	9
USP7	USP7	0.88	0.09	0	0	1	0	2	0	0	0	2	0	5	2	16	11	7	11	9	17	4	7	8
AMPD2	AMPD2	0	0	0	0	0	0	0	1	0	0	0	0	0	0	0	0	0	0	0	0	0	0	0
COPG2	COPG2	0	0	0	0	0	0	0	0	0	4	0	0	36	42	92	70	53	63	63	47	58	60	52
CAPZB	CAPZB	0	0	0	0	0	0	0	0	0	0	1	0	1	1	20	12	9	17	9	14	6	8	13
NOL11	NOL11	0.86	0.3	0	0	8	0	3	0	5	6	10	3	8	8	2	0	0	0	0	0	0	0	0
NOL10	NOL10	0.79	0.44	0	0	3	4	6	0	0	1	17	8	2	2	1	0	0	1	0	0	0	0	1
EEF1D	EEF1D	0	0	0	0	0	0	0	0	0	1	0	0	12	13	7	7	7	4	5	5	5	3	5
HIST3H2BB	HIST3H2BB	0.58	0.02	0	0	1	0	2	1	1	1	3	1	14	14	13	26	21	32	26	44	47	30	62
POLQ	POLQ	0	0	0	0	0	0	4	0	0	0	0	1	0	0	0	0	0	0	0	0	0	0	0
FAM120A	FAM120A	0	0	0	0	0	0	0	0	6	1	0	0	1	0	1	1	0	0	0	1	0	0	1
3	A2MP1	1.47	1.35	0	0	1	0	0	0	0	0	0	0	0	0	0	0	0	0	0	0	0	0	0
WDR7	WDR7	0	0	0	0	0	0	1	1	0	0	0	2	0	0	0	0	0	0	0	0	0	0	0
CCDC43	CCDC43	0.91	0.77	0	0	10	5	8	8	8	4	11	13	2	2	0	2	1	1	1	0	1	1	1
ACIN1	ACIN1	1.1	0.72	0	0	40	30	44	29	39	21	28	36	50	42	5	40	27	36	21	36	8	11	25
CENPC	CENPC	0	0	0	0	0	0	0	0	0	2	2	8	1	0	0	1	0	3	0	8	0	0	1
LPP	LPP	0	0	0	0	0	0	0	0	0	0	0	2	0	0	0	0	0	4	0	0	0	0	0
RRS1	RRS1	0	0	0	0	0	0	0	0	0	0	0	3	10	11	0	0	0	0	0	1	0	0	0
UTP14A	UTP14A	1.24	1	0	0	21	26	13	14	18	16	34	27	4	5	1	2	2	2	2	1	1	1	1
CLCF1	CLCF1	0	0	0	0	0	0	0	0	1	2	0	0	0	0	0	0	0	0	0	0	0	0	0
BAZ1B	BAZ1B	1.09	0.36	0	0	51	18	43	30	19	15	30	57	102	77	30	49	44	27	39	66	32	32	31
PHGDH	PHGDH	0.9	0.29	0	0	4	3	6	6	3	6	0	2	0	0	10	8	6	9	8	9	4	11	15
SEC24B	SEC24B	1.12	0.9	0	0	11	5	7	8	8	8	5	5	4	5	2	0	0	1	1	2	0	0	1
THOC2	THOC2	1	0.67	0	0	23	19	16	8	22	8	35	52	20	21	5	7	8	3	4	13	4	0	7
CNOT1	CNOT1	2.75	0.29	0	0	0	3	0	0	0	0	0	0	0	0	5	1	2	2	6	1	3	4	5
CEP350	CEP350	0.81	0.67	0	0	5	5	5	3	10	7	7	9	0	0	2	0	0	0	0	0	0	0	2
HNRNPDL	HNRNPDL	1	0.35	0	0	3	0	0	0	1	1	4	3	3	3	4	3	1	1	2	2	3	3	5
SYNCRIP	SYNCRIP	0.84	0.61	0	0	10	10	18	0	16	16	13	13	5	6	4	4	3	8	1	9	2	1	8
ZC3H11A	ZC3H11A	0.92	0.83	0	0	46	36	41	38	61	31	54	55	16	16	9	18	13	4	5	15	5	4	8
LIN9	LIN9	0	0	0	0	0	0	0	1	0	0	0	0	0	0	0	0	0	0	0	0	0	0	0
ZNF280C	ZNF280C	0.59	0.35	0	0	6	2	7	5	1	7	12	14	12	11	1	1	0	3	1	1	3	1	2
VIM	VIM	0.62	0.07	0	0	11	7	18	14	21	14	10	15	96	120	63	90	94	113	88	92	45	40	95
PLEKHA5	PLEKHA5	0	0	0	0	0	0	0	0	0	0	6	2	5	4	1	0	0	2	0	1	0	0	0
GNG4	GNG4	0	0	0	0	0	0	0	0	0	14	0	0	0	0	0	0	0	0	0	0	0	0	0
PLEKHA1	PLEKHA1	0	0	0	0	0	0	0	0	0	3	3	0	0	0	0	1	1	3	0	0	0	0	1
EHBP1	EHBP1	1.58	0.26	0	0	0	1	0	0	0	0	0	0	2	0	5	4	0	5	2	2	2	2	2
APC	APC	0	0	0	0	0	0	2	0	3	0	6	0	5	1	1	0	2	0	0	2	0	0	1
ACTB	ACTB	4.97	0.06	0	0	0	10	0	2	0	0	0	0	31	30	40	61	56	37	26	65	21	17	42
MAVS	MAVS	0	0	0	0	0	0	0	0	0	3	2	0	0	0	1	0	0	7	0	0	0	0	0
SPTY2D1	SPTY2D1	0	0	0	0	0	0	0	0	0	0	0	4	0	0	0	0	0	0	0	0	0	0	0
STXBP4	STXBP4	0	0	0	0	0	0	2	1	0	0	2	0	0	0	0	0	0	0	0	0	0	0	0
SNX2	SNX2	0	0	0	0	0	0	0	0	1	0	0	0	2	1	2	1	1	7	3	1	4	2	4
POM121C	POM121C	0.87	0.8	0	0	35	41	50	44	42	39	50	53	1	1	1	1	2	1	0	1	0	0	1
GTSE1	GTSE1	1.12	0.68	0	0	11	5	0	7	7	0	15	17	0	0	0	1	0	0	0	0	1	0	0
SNX5	SNX5	0	0	0	0	0	0	3	3	2	2	0	0	0	0	0	0	0	0	0	0	1	0	0
SNX4	SNX4	0	0	0	0	0	0	0	0	1	3	0	0	0	0	0	0	0	1	0	0	0	0	0
SNX9	SNX9	0.89	0.48	0	0	2	8	5	2	5	6	4	19	0	0	1	1	2	7	3	1	0	0	3
PGAM1	PGAM1	0	0	0	0	0	0	4	1	3	0	0	0	0	1	3	2	0	5	2	11	1	1	1
KHDRBS1	KHDRBS1	1.23	0.95	0	0	26	14	10	9	14	15	26	26	1	2	7	2	1	6	0	5	0	0	2
BBS2	BBS2	0	0	0	0	0	0	0	3	0	0	0	0	0	0	0	0	0	0	0	0	0	0	0
YTHDF3	YTHDF3	0.72	0.47	0	0	17	5	30	19	14	9	3	17	0	1	4	2	1	1	0	0	0	0	0
YTHDF2	YTHDF2	1.05	0.9	0	0	39	26	25	38	31	19	32	47	0	0	3	2	0	3	3	1	2	2	1
YTHDF1	YTHDF1	0.35	0.19	0	0	3	0	9	8	2	0	11	6	0	1	4	2	1	3	0	1	0	0	0
MED1	MED1	1.03	0.91	0	0	132	123	126	129	116	76	152	188	21	17	8	7	5	9	5	6	5	3	6
ARFGAP2	ARFGAP2	0.92	0.43	0	0	11	1	3	1	10	1	8	19	0	0	1	1	0	1	0	0	0	0	0
ARFGAP3	ARFGAP3	0.33	0.21	0	0	1	0	7	0	6	4	3	0	0	0	0	0	0	1	0	0	0	0	0
ARFGAP1	ARFGAP1	0.95	0.23	0	0	4	2	3	1	4	5	3	3	8	9	8	4	1	23	4	3	5	3	5
DHX30	DHX30	0	0	0	0	0	0	0	0	0	1	0	0	0	0	2	0	0	0	0	1	0	1	1
CCAR1	CCAR1	0	0	0	0	0	0	0	0	0	0	0	3	0	0	2	0	0	0	0	4	0	0	0
ZNF598	ZNF598	0.61	0.48	0	0	3	6	6	4	10	9	10	14	0	0	3	0	2	1	0	1	0	0	0
MTDH	MTDH	1.08	1.01	0	0	69	63	64	56	58	49	70	89	16	12	4	4	2	5	3	9	1	3	10
COPZ1	COPZ1	1.21	0.92	0	0	5	6	7	6	5	4	2	3	0	1	0	0	0	0	0	1	0	0	0
RUVBL1	RUVBL1	1.2	0.15	0	0	22	8	17	10	7	4	23	14	33	35	56	75	50	63	74	61	66	56	57
SUB1	SUB1	1.2	0.69	0	0	3	3	0	0	2	5	3	5	3	1	1	1	0	4	2	2	1	1	0
DDX52	DDX52	0.87	0.6	0	0	11	8	14	4	6	6	15	28	0	0	1	0	2	1	3	5	1	2	4
DENR	DENR	0.8	0.63	0	0	10	12	17	6	15	9	23	21	0	0	0	0	0	0	0	0	0	0	0
ADAR	ADAR	1.37	0.77	0	0	27	39	0	32	40	48	21	0	13	9	17	10	13	4	2	25	5	4	11
KHSRP	KHSRP	1.37	0.97	0	0	25	24	24	17	26	21	8	11	12	7	18	26	20	19	11	26	10	10	17
FTSJ3	FTSJ3	0.92	0.82	0	0	67	55	64	76	60	48	67	102	24	25	12	10	5	3	6	9	8	5	8
DDX54	DDX54	0.87	0.16	0	0	2	0	4	0	0	0	0	4	0	0	6	1	5	2	3	12	3	6	9
DDX55	DDX55	0	0	0	0	0	0	0	0	0	0	3	5	1	1	5	2	3	1	2	2	2	3	3
NOSIP	NOSIP	1.02	0.6	0	0	1	1	0	0	0	0	3	4	0	0	0	0	0	0	1	0	0	0	0
APOL6	APOL6	1.2	0.91	0	0	0	1	0	0	0	0	2	0	0	0	0	0	0	0	0	0	0	0	0
SF3A1	SF3A1	1.3	0.58	0	0	15	10	10	5	14	9	6	15	24	21	15	12	4	13	7	16	7	3	9
PRKG2	PRKG2	0	0	0	0	0	0	2	0	0	0	0	3	0	0	0	0	0	0	0	0	0	0	0
KPNA3	KPNA3	1.47	0.5	0	0	1	0	0	0	0	0	0	0	0	0	2	0	0	1	1	1	1	0	2
PKM	PKM	0.29	0.07	0	0	2	1	14	7	6	7	7	4	23	24	18	4	3	31	27	25	12	16	9
PKN2	PKN2	0	0	0	0	0	0	0	0	0	2	2	2	0	0	0	1	0	4	1	0	3	2	0
DPYSL2	DPYSL2	2.41	0.06	0	0	3	0	0	0	0	0	0	0	0	2	22	15	15	33	18	18	16	16	17
CFAP58	CFAP58	0	0	0	0	0	0	0	0	0	0	0	1	0	0	0	0	0	0	0	0	0	0	0
MRE11	MRE11	0.91	0.8	0	0	46	46	56	47	36	43	70	69	0	0	0	0	0	0	0	0	0	0	0
POP4	POP4	0	0	0	0	0	0	0	0	1	0	0	2	0	0	2	0	0	0	0	0	0	0	2
NUDT5	NUDT5	0.88	0.67	0	0	9	6	5	4	15	6	11	14	1	1	2	0	0	6	0	1	0	0	0
PFDN2	PFDN2	0	0	0	0	0	0	0	0	2	0	0	0	0	0	3	2	3	6	1	2	2	2	8
ZNF24	ZNF24	0	0	0	0	0	0	0	0	0	0	8	9	0	0	2	0	0	0	0	0	1	0	0
EIF4H	EIF4H	0.65	0.46	0	0	10	3	10	8	6	5	16	20	1	1	1	0	0	3	3	1	1	1	2
ACLY	ACLY	0	0	0	0	0	0	0	0	0	0	0	1	0	0	6	2	0	3	2	5	2	3	2
ARGLU1	ARGLU1	1.24	1.11	0	0	26	25	21	21	27	17	21	20	1	0	0	0	0	0	0	0	0	0	0
FLJ00361	FLJ00361	0	0	0	0	0	0	0	0	3	0	0	0	0	0	0	0	0	0	0	0	0	0	0
NR3C1	NR3C1	1.18	0.32	0	0	2	0	0	0	0	0	4	0	7	2	2	2	0	0	0	0	0	1	1
EIF4B	EIF4B	0.94	0.71	0	0	38	30	35	29	52	15	40	61	38	43	31	28	23	26	11	18	14	13	23
DNAH2	DNAH2	0	0	0	0	0	0	0	0	4	0	0	0	0	0	0	0	0	0	0	0	0	0	0
VCPIP1	VCPIP1	0	0	0	0	0	0	0	0	0	2	0	0	6	9	18	8	5	26	7	6	6	5	6
EGLN1	EGLN1	1.11	0.85	0	0	19	16	24	15	14	6	13	29	0	0	0	0	1	1	0	1	0	0	0
HIST3H3	HIST3H3	0	0	0	0	0	0	0	0	6	0	0	0	5	3	3	7	3	5	2	5	2	1	5
AMOT	AMOT	0	0	0	0	0	0	1	0	0	0	0	0	0	0	0	1	0	0	0	2	0	0	1
CEP170	CEP170	1.18	0.96	0	0	80	47	48	36	42	39	81	92	17	19	30	28	31	32	21	19	12	12	29
GTPBP4	GTPBP4	1.03	0.58	0	0	1	7	4	0	3	6	5	9	3	1	1	3	2	0	0	3	1	0	1
HAT1	HAT1	1.03	0.84	0	0	39	27	29	39	37	35	25	26	1	2	5	1	1	3	2	2	0	0	1
DNAH9	DNAH9	0	0	0	0	0	0	0	0	0	0	8	0	0	0	0	0	0	0	0	0	0	0	0
RPL30	RPL30	1.06	0.21	0	0	0	1	1	0	0	0	2	0	0	0	4	2	4	0	4	4	5	3	5
TUBB	TUBB	1.76	0.12	0	0	48	6	55	5	5	10	2	5	21	25	85	122	87	67	80	81	115	117	94
RAI14	RAI14	1.47	0.06	0	0	3	0	0	0	0	0	4	0	31	25	8	22	25	6	9	18	7	9	22
PFN1	PFN1	1.28	1.18	0	0	28	18	16	13	19	16	22	24	6	9	4	0	1	2	0	8	0	0	0
KDM3B	KDM3B	0.85	0.15	0	0	1	2	4	4	0	2	0	2	17	12	17	12	2	10	11	6	4	6	9
SFSWAP	SFSWAP	0	0	0	0	0	0	0	0	0	0	2	0	4	2	3	2	2	2	2	1	0	0	2
ATP5A1	ATP5A1	0.4	0.03	0	0	0	1	5	3	3	2	4	0	0	0	42	51	44	55	20	53	17	26	44
CREBBP	CREBBP;EP300	0	0	0	0	0	0	0	2	0	0	0	0	0	0	0	0	0	0	0	0	0	0	0
SUGP1	SUGP1	0.67	0.1	0	0	1	0	0	0	4	0	1	3	15	12	7	5	3	10	7	3	2	3	5
NUDCD3	NUDCD3	0	0	0	0	0	0	0	2	0	0	0	1	0	0	0	0	0	0	0	0	0	0	0
H1FX	H1FX	0.92	0.43	0	0	3	1	0	5	0	2	4	2	0	0	2	2	6	0	0	4	0	1	3
STAM	STAM	0	0	0	0	0	0	0	0	1	0	0	0	0	0	0	0	0	2	2	0	0	1	1
POTEKP	POTEKP	0	0	0	0	0	0	0	0	0	0	3	0	0	0	0	0	0	0	0	0	0	0	0
SMARCA5	SMARCA5	2.41	0.04	0	0	3	0	0	0	0	0	0	0	31	34	32	42	44	18	30	58	23	27	43
CCDC47	CCDC47	1.44	0.9	0	0	4	3	2	0	5	1	2	4	1	1	3	0	2	0	3	1	1	2	0
RFC4	RFC4	0.64	0.42	0	0	1	0	2	2	0	0	2	2	2	1	2	0	0	1	1	3	1	1	0
ATM	ATM	0	0	0	0	0	0	0	0	5	0	0	0	0	0	0	0	0	0	0	0	0	0	0
TCERG1	TCERG1	1.37	0.41	0	0	5	7	2	0	0	4	13	9	16	17	5	7	3	3	1	6	1	3	3
TEX10	TEX10	1.24	0.89	0	0	14	11	10	5	8	3	18	21	0	1	1	0	1	2	1	1	0	1	0
IRS1	IRS1	0	0	0	0	0	0	0	0	4	0	0	0	0	0	0	0	0	0	0	0	0	0	0
GPBP1	GPBP1	0.64	0.38	0	0	7	1	9	4	3	2	13	10	0	0	0	0	0	0	0	0	0	0	0
TMSB10	TMSB10	1.16	0.56	0	0	1	0	0	0	0	0	0	2	1	1	0	0	0	0	0	2	0	0	0
EIF4E2	EIF4E2	1.47	0.11	0	0	1	0	0	0	0	0	0	0	14	9	11	9	8	8	8	2	3	6	7
KIF11	KIF11	0.93	0.73	0	0	5	7	8	4	5	8	6	11	7	4	3	1	5	1	2	8	0	1	4
POLD3	POLD3	1.05	0.77	0	0	3	2	3	1	0	2	4	5	1	0	3	1	1	1	0	0	0	0	0
ELOA	ELOA	0	0	0	0	0	0	0	0	0	13	0	0	0	0	0	0	0	0	0	0	0	0	0
FAM208A	FAM208A	0	0	0	0	0	0	0	0	0	2	0	2	21	19	10	6	5	3	3	15	0	3	10
WDHD1	WDHD1	1.09	0.58	0	0	9	5	7	0	11	3	12	7	12	12	5	6	3	2	0	3	0	2	3
CBX3	CBX3	1.63	0.13	0	0	5	1	0	0	0	0	3	7	6	8	7	21	14	31	10	10	10	4	11
CBX2	CBX2	0	0	0	0	0	0	0	0	0	0	5	0	0	0	2	1	1	0	0	1	0	0	0
ATRX	ATRX	0	0	0	0	0	0	4	0	0	0	2	6	33	20	6	9	11	11	4	18	2	4	20
NUP62	NUP62	0.55	0.42	0	0	4	3	9	3	9	10	7	5	0	0	5	1	3	1	2	4	1	4	0
DAW1	DAW1	0	0	0	0	0	0	1	0	0	0	0	0	0	0	0	0	0	0	0	0	0	0	0
MRGPRX4	MRGPRX4	0	0	0	0	0	0	0	0	0	0	0	1	0	0	0	0	0	0	0	0	0	0	0
RACGAP1	RACGAP1	0.55	0.2	0	0	0	3	0	0	2	0	12	13	0	0	5	7	7	1	4	4	4	3	4
DNAJB1	DNAJB1	0.99	0.76	0	0	25	13	13	19	19	8	27	35	4	3	2	0	1	2	1	1	0	0	0
MYH9	MYH9	0.77	0.26	0	0	60	35	81	50	65	73	49	53	25	16	119	85	123	0	120	84	131	117	143
RPS6KB1	RPS6KB1	0	0	0	0	0	0	0	0	3	0	0	2	0	0	0	0	0	0	0	0	0	0	0
SNRPA1	SNRPA1	1.39	0.14	0	0	0	4	0	1	4	0	1	3	15	12	7	11	5	9	8	9	12	11	6
KRT74	KRT74	0	0	0	0	0	0	2	0	0	0	0	0	0	0	0	0	1	0	0	0	0	0	1
GPATCH11	GPATCH11	0	0	0	0	0	0	0	0	0	0	2	6	0	0	0	0	0	0	0	0	0	0	0
SLC1A5	SLC1A5	0	0	0	0	0	0	0	1	0	0	0	0	4	4	10	9	3	7	5	13	1	5	3
2	A2M	0.82	0.67	0	0	141	83	156	171	129	76	155	151	0	0	0	0	0	0	0	0	0	0	0
KIAA1671	KIAA1671	1.94	0.44	0	0	2	0	0	0	0	0	0	0	2	1	2	1	0	3	1	0	1	2	1
SRP14	SRP14	0	0	0	0	0	0	1	0	1	1	2	0	2	1	4	2	3	0	1	5	2	3	3
HNRNPAB	HNRNPAB	1.9	1.27	0	0	22	21	16	7	17	7	0	24	2	1	8	9	9	2	0	4	1	2	4
FASN	FASN	0.49	0.01	0	0	7	6	12	14	25	24	5	4	65	59	540	269	154	313	491	161	241	238	207
SRP72	SRP72	0.69	0.26	0	0	6	0	0	2	2	2	10	14	2	1	7	0	1	0	1	1	5	1	0
SUGP2	SUGP2	1.23	0.42	0	0	13	12	10	8	10	14	10	9	26	15	18	32	29	5	11	23	15	9	24
MROH2B	MROH2B	0.96	0.69	0	0	3	6	2	7	4	7	4	6	0	0	0	0	0	0	0	0	0	0	0
RANBP3	RANBP3	1.84	0.19	0	0	16	0	7	0	0	0	5	12	14	15	19	15	5	20	11	12	10	10	8
RANBP2	RANBP2	0.77	0.61	0	0	158	137	213	208	212	250	124	157	124	108	110	140	131	86	58	142	51	48	113
PHACTR4	PHACTR4	0.59	0.29	0	0	4	0	6	0	8	5	0	4	5	6	2	0	0	2	0	1	0	1	0
CLIC4	CLIC4	0.87	0.48	0	0	1	3	0	1	0	0	9	8	0	0	0	0	0	0	0	1	0	0	0
H1F0	H1F0	0.88	0.65	0	0	35	22	36	51	19	24	19	51	0	0	1	0	1	0	0	0	0	0	1
LARP4B	LARP4B	0.75	0.64	0	0	22	15	30	22	24	12	36	32	0	0	0	0	0	0	1	0	0	1	2
SMNDC1	SMNDC1	0.72	0.59	0	0	5	5	6	5	5	6	12	13	0	0	1	0	0	0	0	2	0	0	0
HNRNPA3	HNRNPA3	1.22	1.03	0	0	21	13	12	16	11	9	18	19	3	6	2	1	1	2	0	6	2	1	1
HNRNPA0	HNRNPA0	0.93	0.59	0	0	7	6	9	6	7	3	7	14	4	6	5	10	2	12	1	6	1	2	6
HNRNPA1	HNRNPA1	1.45	1.31	0	0	83	65	39	44	54	41	67	74	11	15	18	23	7	14	1	18	3	4	9
AIM1	AIM1	0	0	0	0	0	0	10	0	0	18	0	0	0	0	0	0	0	0	0	0	0	0	0
U2SURP	U2SURP	0.96	0.89	0	0	93	77	78	90	86	80	92	129	28	30	37	31	28	19	18	39	16	13	32
HN1L	HN1L	1.06	0.93	0	0	20	16	18	10	20	13	19	28	1	4	8	8	5	12	5	4	5	4	4
ENO3	ENO3	0	0	0	0	0	0	0	0	1	1	0	2	1	2	4	9	5	13	11	9	0	3	6
NDC80	NDC80	0	0	0	0	0	0	3	0	0	0	6	6	0	0	0	0	0	0	0	0	0	0	0
BBX	BBX	0	0	0	0	0	0	4	0	0	2	3	4	13	10	0	0	0	1	1	3	0	1	0
RPS4X	RPS4X	0.96	0.77	0	0	26	41	30	23	35	34	60	45	0	0	6	7	2	11	8	8	4	2	6
CTDSPL2	CTDSPL2	0	0	0	0	0	0	0	0	0	0	0	2	0	0	0	0	0	0	0	0	0	0	0
IGF2BP3	IGF2BP3	0	0	0	0	0	0	1	0	0	2	0	1	0	0	1	3	5	9	3	8	3	6	3
NAT10	NAT10	1.02	0.78	0	0	48	55	47	50	24	40	74	92	57	26	7	11	14	6	13	21	5	4	7
TJP2	TJP2	2.98	0.43	0	0	3	3	0	0	0	0	0	3	1	0	11	8	4	6	2	1	1	2	6
ATXN2L	ATXN2L	1.01	0.88	0	0	142	115	133	145	158	110	100	137	25	34	36	30	19	35	18	25	22	12	21
TJP1	TJP1	1.24	0.32	0	0	8	11	6	4	4	6	18	11	36	36	17	8	12	11	10	10	3	0	9
BUD13	BUD13	0.5	0.29	0	0	4	0	2	3	3	2	9	11	0	0	0	0	0	0	0	0	0	0	0
LRRFIP1	LRRFIP1	0.5	0.29	0	0	2	0	7	0	4	0	3	4	3	2	4	4	2	2	0	2	0	0	3
NEDD1	NEDD1	0	0	0	0	0	0	3	3	0	2	2	2	0	0	1	0	0	3	0	1	0	2	1
PUM3	PUM3	0	0	0	0	0	0	0	0	0	0	3	1	0	0	0	0	0	0	0	0	0	0	0
SNAP29	SNAP29	1.11	0.23	0	0	1	0	0	0	0	0	2	0	1	1	4	1	1	7	2	0	2	0	0
RANBP1	RANBP1	0.78	0.26	0	0	10	0	4	1	10	0	12	14	0	0	4	2	1	10	5	4	2	1	2
TFIP11	TFIP11	0.93	0.63	0	0	14	5	10	12	9	4	8	21	7	7	6	3	3	10	6	9	9	2	8
CDK1	CDK1	0	0	0	0	0	0	1	0	2	3	0	5	0	0	13	8	9	13	10	12	7	11	9
TCP1	TCP1	0	0	0	0	0	0	0	0	0	1	0	0	0	0	103	93	60	24	81	46	148	121	68
RC3H2	RC3H2	0	0	0	0	0	0	13	4	0	0	0	0	1	4	0	0	0	0	0	0	0	0	0
RPS3A	RPS3A	1.07	0.81	0	0	24	35	19	20	46	18	37	41	5	3	12	8	5	6	4	6	6	8	6
DIDO1	DIDO1	0.82	0.1	0	0	7	2	6	8	7	0	5	9	60	42	17	14	14	11	14	34	6	9	15
SH3PXD2B	SH3PXD2B	1.12	0.71	0	0	4	4	5	0	3	0	7	9	0	1	0	0	0	2	0	0	0	0	0
TAF9B	TAF9B	0	0	0	0	0	0	0	0	0	0	2	0	3	2	0	3	1	6	0	1	1	0	0
HP1BP3	HP1BP3	0.88	0.38	0	0	3	4	5	0	2	6	4	10	5	6	10	12	9	8	7	9	5	7	6
PATL1	PATL1	0.49	0.35	0	0	1	0	5	1	2	1	0	3	0	0	1	0	0	0	1	0	0	0	0
LENG8	LENG8	0	0	0	0	0	0	0	0	0	0	2	0	4	3	10	7	5	3	6	6	2	3	4
POLA2	POLA2	0	0	0	0	0	0	0	0	0	0	0	1	1	0	1	1	3	1	1	0	0	0	0
POLA1	POLA1	0	0	0	0	0	0	0	0	0	0	0	2	4	3	2	4	0	1	3	2	0	0	2
KTN1	KTN1	1.16	0.7	0	0	9	13	3	16	9	13	8	9	15	7	5	0	1	0	0	6	0	0	1
TCEB3	TCEB3	1.22	0.79	0	0	46	32	37	16	26	0	55	78	5	6	12	6	6	5	7	6	3	5	7
NOC3L	NOC3L	0.52	0.19	0	0	0	22	24	20	32	22	27	30	0	1	7	3	3	1	4	5	2	1	4
SYNRG	SYNRG	0	0	0	0	0	0	0	0	0	2	0	0	0	0	0	0	0	0	2	0	0	0	1
NOP16	NOP16	0	0	0	0	0	0	0	0	3	0	2	0	0	0	0	0	0	0	0	0	0	0	0
SF3B1	SF3B1	1.25	0.72	0	0	53	36	34	21	26	26	58	60	66	53	41	45	40	37	29	42	18	26	28
PRDX2	PRDX2	0.78	0.28	0	0	2	1	2	2	4	1	4	0	3	4	3	3	4	5	0	12	3	4	5
PRDX1	PRDX1	2.35	0.4	0	0	7	11	0	0	9	5	1	7	11	11	6	18	14	10	9	24	16	10	21
SF3B2	SF3B2	1.22	1.08	0	0	79	84	67	47	70	55	94	96	41	31	18	25	19	19	17	21	11	14	18
XIRP2	XIRP2	0	0	0	0	0	0	0	0	0	0	0	7	0	0	0	0	0	0	0	0	0	0	0
GLYR1	GLYR1	2.24	0.43	0	0	4	3	0	1	0	0	3	3	3	2	9	5	4	3	4	15	3	3	1
MRPS11	MRPS11	1.37	1.03	0	0	1	1	1	0	0	0	2	0	0	0	0	0	0	0	0	0	0	0	0
MYBL2	MYBL2	0	0	0	0	0	0	4	0	0	2	2	0	0	0	0	1	1	0	0	0	0	0	0
SMARCA4	SMARCA4	0	0	0	0	0	0	0	0	0	0	0	3	11	9	7	6	5	0	0	7	0	1	6
UIMC1	UIMC1	0.83	0.3	0	0	5	0	1	0	2	2	6	9	5	3	9	1	5	1	1	2	0	0	1
KIF18B	KIF18B	0	0	0	0	0	0	0	0	0	0	1	0	0	0	0	0	0	0	0	0	0	0	0
HDGFRP2	HDGFRP2	0	0	0	0	0	0	0	0	0	0	0	1	0	0	0	0	0	0	0	0	0	0	0
NOP58	NOP58	0.84	0.7	0	0	11	11	14	6	18	9	16	23	10	4	2	3	6	1	2	10	1	3	3
HSPE1-MOB4	HSPE1-MOB4	0	0	0	0	0	0	0	0	0	0	0	2	0	0	0	0	0	0	0	0	0	0	0
NOP56	NOP56	1.06	0.56	0	0	3	8	5	0	9	5	8	8	8	6	7	3	5	4	1	13	0	0	5
FYN	FYN	0	0	0	0	0	0	5	0	4	0	14	0	0	0	2	0	1	0	1	0	1	1	1
TFCP2	TFCP2	1.01	0.47	0	0	1	2	0	2	2	0	4	2	2	2	4	0	0	3	1	0	0	4	1
RB1	RB1	0	0	0	0	0	0	0	0	0	0	0	3	0	0	0	0	0	0	0	0	0	0	0
CEP131	CEP131	0	0	0	0	0	0	0	0	0	0	0	2	0	0	0	0	0	0	0	0	0	0	0
HSPD1	HSPD1	1.16	0.88	0	0	80	126	73	124	101	100	67	92	9	5	4	1	5	2	2	31	2	9	8
DNAJC12	DNAJC12	0.32	0.23	0	0	2	0	4	0	8	4	7	8	0	0	0	0	0	0	0	0	0	0	0
TXNRD3NB	TXNRD3NB	0	0	0	0	0	0	4	0	0	0	0	0	0	0	0	0	0	0	0	0	0	0	0
CEBPZ	CEBPZ	0.88	0.69	0	0	16	10	16	7	10	12	23	26	3	0	2	0	1	1	1	2	1	2	4
EPRS	EPRS	0.35	0.08	0	0	3	0	10	6	10	4	3	0	20	11	11	23	21	12	13	22	6	9	20
XRCC6	XRCC6	0.9	0.23	0	0	1	5	4	4	7	4	3	0	13	16	6	3	2	1	8	9	0	3	4
CCT6A	CCT6A	1.17	0.01	0	0	0	2	0	0	4	1	0	0	3	3	91	54	54	12	81	42	153	133	78
SECISBP2	SECISBP2	0.5	0.28	0	0	3	0	6	0	4	0	6	9	0	0	0	0	0	0	0	0	0	0	0
CDC5L	CDC5L	0.97	0.49	0	0	18	9	5	5	8	2	38	34	19	12	6	9	10	13	13	14	8	3	10
SYNGR2	SYNGR2	0	0	0	0	0	0	0	0	0	0	0	4	0	0	0	0	0	0	0	0	0	0	0
KRI1	KRI1	0.88	0.23	0	0	18	0	15	0	4	0	12	34	2	1	1	4	2	1	0	2	2	2	6
INTS8	INTS8	0	0	0	0	0	0	0	0	0	0	0	2	0	0	0	0	0	0	0	0	0	0	0
WARS	WARS	0.5	0.11	0	0	4	1	4	0	6	9	7	10	15	14	14	8	10	27	19	13	18	16	11
HIST1H3A	HIST1H3A;HIST1H...	1.38	0.81	0	0	19	9	7	19	0	12	1	20	5	3	3	7	3	5	2	5	2	1	5
ENAH	ENAH	1.57	0.62	0	0	6	3	3	1	0	2	4	6	1	0	6	1	1	8	5	2	1	3	0
SLK	SLK	0.99	0.89	0	0	77	52	66	53	82	62	60	79	18	25	35	25	14	43	23	15	18	15	20
SCML2	SCML2	0	0	0	0	0	0	0	0	0	4	3	1	12	10	22	26	21	31	18	28	7	7	21
AGTPBP1	AGTPBP1	0.78	0.51	0	0	7	10	11	16	8	21	7	3	0	0	5	0	0	1	0	2	0	0	0
CTNNA1	CTNNA1	1.19	0.65	0	0	5	14	0	22	5	8	4	11	2	2	0	0	0	1	0	1	0	0	0
PAPOLB	PAPOLB	0	0	0	0	0	0	0	0	0	0	0	4	8	9	9	6	1	6	3	0	0	2	1
ABCF2	ABCF2	1.31	0.56	0	0	5	4	3	0	7	0	3	9	8	10	1	0	0	0	0	4	1	0	0
CCNB2	CCNB2	0	0	0	0	0	0	0	0	0	0	0	1	0	0	0	0	0	0	0	0	0	0	0
CCNB1	CCNB1	0.83	0.68	0	0	13	10	16	17	16	15	10	11	0	0	0	0	0	1	0	2	0	0	0
IST1	IST1	0.77	0.51	0	0	1	2	0	0	3	3	6	3	0	0	0	0	0	0	0	0	0	0	0
ABCF1	ABCF1	0.86	0.6	0	0	15	11	10	13	8	6	27	36	11	6	8	5	3	5	1	2	3	6	4
ZNF154	ZNF154	0	0	0	0	0	0	0	0	1	0	0	0	0	0	0	0	0	0	0	0	0	0	0
GCN1	GCN1	0.7	0.53	0	0	22	18	31	25	37	43	18	20	0	0	0	0	0	0	0	0	0	0	0
BZW1	BZW1	0	0	0	0	0	0	2	2	0	1	0	2	0	0	0	0	0	0	0	0	0	0	0
NSUN2	NSUN2	1.13	0.24	0	0	0	2	0	0	2	3	0	0	2	1	1	2	2	4	4	4	2	2	9
GGA3	GGA3	1.47	0.8	0	0	1	0	0	0	0	0	0	0	0	0	0	0	0	1	0	1	0	0	0
NOTCH2	NOTCH2	0	0	0	0	0	0	8	0	0	0	0	4	0	0	0	0	0	0	0	0	0	0	0
HLA-DQA1	HLA-DQA1	0	0	0	0	0	0	0	4	0	0	0	0	0	0	0	0	0	0	0	0	0	0	0
CUL4A	CUL4A	0	0	0	0	0	0	8	0	0	0	0	0	3	3	2	0	1	0	1	0	1	0	0
CUL4B	CUL4B	0.9	0.44	0	0	3	5	0	3	13	8	0	5	4	5	10	4	3	2	1	2	1	2	5
CNOT2	CNOT2	0.57	0.34	0	0	2	0	6	3	1	0	3	1	0	0	0	1	2	0	0	3	1	1	1
PICALM	PICALM	0	0	0	0	0	0	0	0	3	0	0	0	2	1	0	0	0	0	1	1	0	1	0
WIPF2	WIPF2	0	0	0	0	0	0	0	0	0	0	0	1	0	0	0	0	0	0	0	0	0	0	0
C21ORF59	C21orf59	0	0	0	0	0	0	0	0	0	0	3	0	0	0	0	0	0	1	0	0	0	0	0
GLCCI1	GLCCI1	0	0	0	0	0	0	1	0	0	0	2	2	0	0	0	0	0	0	0	0	0	0	0
BPTF	BPTF	4.28	0.19	0	0	7	0	0	0	0	0	0	0	10	2	2	5	15	1	1	12	5	1	7
HMGXB4	HMGXB4	0	0	0	0	0	0	1	0	0	0	0	0	3	2	2	0	1	2	3	8	2	2	4
ADD3	ADD3	0.59	0.26	0	0	8	0	9	4	3	6	10	11	0	0	9	4	1	10	2	6	0	2	3
ACTG1	ACTB;ACTG1	0.81	0.04	0	0	5	0	18	0	0	0	0	0	31	30	40	61	56	37	26	66	21	17	42
RPS17	RPS17;RPS17L	0	0	0	0	0	0	0	0	0	0	3	0	2	2	2	1	0	1	1	3	1	2	2
ZFR	ZFR	0.59	0.19	0	0	2	4	6	9	3	3	8	9	22	22	2	2	3	6	1	11	0	0	1
CDKN2AIP	CDKN2AIP	0	0	0	0	0	0	1	0	0	0	0	0	12	8	4	4	3	1	0	2	0	0	1
PCCA	PCCA	1.05	0.43	0	0	127	139	128	136	152	174	70	118	86	94	183	342	234	100	56	177	155	153	278
RIOK1	RIOK1	0	0	0	0	0	0	2	1	0	0	4	3	0	0	0	0	0	0	1	0	0	0	0
IGF2BP1	IGF2BP1	0.61	0.46	0	0	10	4	13	15	12	10	7	15	0	0	7	10	5	12	6	9	7	10	8
PPIL4	PPIL4	0.75	0.5	0	0	6	3	6	1	1	5	10	18	1	1	6	1	1	2	2	2	0	0	0
CAPRIN1	CAPRIN1	0.89	0.7	0	0	12	5	11	11	13	3	12	8	6	7	5	2	0	0	2	2	1	0	4
CCNT1	CCNT1	0	0	0	0	0	0	0	0	0	0	0	3	16	15	8	9	17	6	5	6	4	2	4
CWC27	CWC27	0	0	0	0	0	0	0	0	0	0	0	3	0	0	0	0	0	0	0	0	0	0	0
ERBB2IP	ERBB2IP	0	0	0	0	0	0	0	0	0	3	0	0	50	31	22	4	4	10	19	7	15	7	11
SNRNP200	SNRNP200	1.11	0.18	0	0	3	7	6	5	4	4	3	7	15	16	28	13	27	18	22	29	13	13	23
UBA1	UBA1	0	0	0	0	0	0	2	0	0	0	0	0	0	1	0	0	0	2	3	10	0	1	1
SUGT1	SUGT1	0.83	0.61	0	0	5	13	9	10	13	6	21	15	1	2	2	1	0	5	0	1	0	0	0
COPG1	COPG1	1.67	0.21	0	0	0	3	0	0	3	0	1	0	2	4	11	9	4	7	4	6	5	6	5
FAM50A	FAM50A	0.75	0.43	0	0	4	0	2	0	2	2	7	5	1	1	2	1	0	1	0	0	0	0	0
PAICS	PAICS	0	0	0	0	0	0	0	2	6	3	0	0	13	15	19	26	16	22	20	18	18	17	19
TPD52	TPD52	0	0	0	0	0	0	0	0	1	2	0	0	0	2	1	0	0	0	0	1	0	1	1
PPP1R2	PPP1R2	1.71	0.4	0	0	2	0	0	0	0	0	0	1	0	2	3	2	1	4	1	1	0	0	0
WASHC5	WASHC5	0	0	0	0	0	0	0	0	0	9	7	0	0	0	0	0	0	0	0	0	0	0	0
NUGGC	NUGGC	1.47	1.35	0	0	1	0	0	0	0	0	0	0	0	0	0	0	0	0	0	0	0	0	0
BCLAF1	BCLAF1	0.82	0.66	0	0	43	30	47	30	35	32	63	78	35	36	39	46	35	39	18	32	19	14	36
PRPF38B	PRPF38B	0.83	0.55	0	0	2	5	3	4	10	6	3	2	0	0	1	0	0	0	1	1	0	0	1
MARCKS	MARCKS	0.9	0.37	0	0	1	1	0	1	3	0	3	1	5	3	2	1	0	0	0	5	0	0	0
ZC3HAV1	ZC3HAV1	1.3	1.1	0	0	100	50	74	61	57	35	58	63	17	17	5	12	4	14	4	5	0	2	7
DLGAP5	DLGAP5	1.05	0.77	0	0	55	39	55	13	55	24	82	54	6	7	5	2	2	6	1	1	0	0	1
NUP214	NUP214	0.92	0.77	0	0	75	71	102	81	90	84	57	77	45	55	25	39	40	22	26	35	20	19	32
MBNL1	MBNL1	1.81	1.57	0	0	1	1	0	0	0	0	0	1	0	0	0	0	0	0	0	0	0	0	0
TAGLN2	TAGLN2	1.17	0.49	0	0	26	5	10	1	19	5	20	27	19	22	14	9	6	23	10	18	3	6	10
SNX1	SNX1	0	0	0	0	0	0	0	3	0	0	0	0	10	10	6	3	2	18	6	2	6	2	5
LUC7L3	LUC7L3	0.74	0.52	0	0	1	3	3	4	6	2	2	3	0	0	3	2	1	0	1	4	0	0	1
LUC7L2	C7orf55-LUC7L2;...	0.83	0.68	0	0	22	17	31	27	29	19	19	19	0	0	5	2	1	1	0	1	1	0	1
H2BFS	H2BFS	0	0	0	0	0	0	6	15	0	0	0	0	0	0	0	0	0	0	0	0	0	0	0
ZNF207	ZNF207	0.45	0.28	0	0	2	0	4	0	3	1	4	10	1	1	0	0	0	0	0	0	0	0	0
RAD18	RAD18	0.84	0.45	0	0	2	0	3	0	0	0	4	1	0	0	2	1	0	1	0	0	0	0	1
TRIM28	TRIM28	0.52	0.08	0	0	2	7	6	10	14	19	6	4	32	39	50	63	49	35	29	35	43	28	27
SHC1	SHC1	0.89	0.53	0	0	0	1	0	0	0	1	2	2	2	0	0	0	0	1	0	0	0	1	0
FHOD1	FHOD1	0.84	0.64	0	0	12	7	14	5	14	13	17	6	0	0	0	0	0	1	1	0	0	0	0
TRIM25	TRIM25	1.14	0.84	0	0	3	4	4	2	0	4	4	5	1	1	4	0	1	2	0	3	3	0	0
PDCL	PDCL	0.43	0.29	0	0	0	1	3	0	4	0	3	8	0	0	2	1	1	1	0	0	1	0	0
PRMT7	PRMT7	0.6	0.33	0	0	0	1	3	0	1	0	6	0	2	2	2	0	0	1	0	0	0	0	0
SLC25A5	SLC25A5	0	0	0	0	0	0	0	2	0	0	0	0	8	9	27	32	21	14	14	20	19	18	19
NEDD8	NEDD8	0	0	0	0	0	0	0	0	0	0	1	1	0	0	0	0	0	1	0	1	0	0	0
RPL14	RPL14	0	0	0	0	0	0	0	0	0	0	1	0	1	3	3	3	6	2	1	5	6	1	5
RPL17	RPL17;RPL17-C18...	1.13	0.84	0	0	11	17	12	15	23	7	8	14	1	2	6	5	6	3	1	5	2	3	7
RPL10	RPL10	0.88	0.72	0	0	19	22	20	25	30	28	23	18	2	2	7	9	8	6	9	7	13	9	5
CHERP	CHERP	1.25	0.34	0	0	15	4	7	8	10	6	6	6	6	3	25	17	10	17	20	25	11	13	12
NUPL2	NUPL2	0.75	0.64	0	0	14	9	18	13	12	11	17	28	0	0	0	0	0	0	0	0	0	0	0
RPL13	RPL13	1.14	0.95	0	0	32	27	22	33	27	28	18	29	3	3	6	10	10	6	2	10	3	1	11
BRD4	BRD4	0	0	0	0	0	0	0	0	3	0	0	9	23	18	23	27	26	9	12	30	6	11	18
COIL	COIL	1.32	1.1	0	0	14	17	12	8	10	9	12	25	7	5	0	0	0	0	0	0	0	0	0
GPATCH4	GPATCH4	1.27	1	0	0	12	13	8	6	9	14	14	9	4	1	0	0	1	0	0	0	1	0	0
BRD7	BRD7	0	0	0	0	0	0	0	0	0	0	1	2	1	1	0	0	0	0	0	1	0	0	0
RPL18	RPL18	0.85	0.76	0	0	9	6	11	7	8	7	11	12	1	1	9	4	7	6	2	6	4	3	5
RPL19	RPL19	1.39	1.04	0	0	30	51	29	37	28	38	25	24	2	2	6	3	3	2	2	5	3	2	6
USP36	USP36	1.17	0.29	0	0	3	0	0	0	0	0	0	8	8	3	0	1	2	0	0	2	0	0	1
ZAN	ZAN	0	0	0	0	0	0	0	0	0	0	3	0	0	0	0	0	0	0	0	1	0	0	0
TOR1AIP1	TOR1AIP1	0	0	0	0	0	0	2	0	4	0	6	6	3	1	0	0	1	0	0	0	0	0	1
SNRPD3	SNRPD3	1.52	0.79	0	0	3	2	4	0	0	1	2	1	2	2	4	0	1	2	0	1	1	0	0
ZAK	ZAK	0	0	0	0	0	0	0	0	0	0	1	3	0	0	0	0	0	0	0	0	0	0	0
CNN3	CNN3	1.01	0.61	0	0	8	8	11	0	5	1	17	20	2	0	2	5	3	7	2	4	0	2	6
CNN2	CNN2	1.26	0.99	0	0	18	11	9	8	17	5	13	20	4	5	2	1	0	4	3	0	1	2	1
SLTM	SLTM	0	0	0	0	0	0	0	0	0	0	0	3	1	0	0	0	0	0	0	2	0	0	1
LIMA1	LIMA1	1.13	0.04	0	0	0	3	0	0	0	0	4	6	54	54	26	15	15	22	8	13	6	10	14
PTPN11	PTPN11	0	0	0	0	0	0	1	0	0	0	0	2	4	3	7	4	2	9	1	3	0	1	1
MCRIP1	MCRIP1	0	0	0	0	0	0	0	0	0	0	0	1	0	0	0	0	0	0	0	0	0	0	0
RBBP6	RBBP6	0.85	0.77	0	0	63	48	60	62	57	54	95	79	13	5	4	4	2	3	2	6	4	1	4
ARCN1	ARCN1	1.04	0.64	0	0	8	3	4	8	1	0	8	12	1	1	6	3	5	5	3	5	3	1	1
RBBP4	RBBP4	2.09	0.1	0	0	4	0	0	2	0	0	0	0	0	1	20	17	22	6	6	13	6	8	8
SPEN	SPEN	0.84	0.34	0	0	10	0	0	7	8	7	6	6	3	2	0	3	4	5	1	10	1	2	7
RSRC1	RSRC1	0.83	0.47	0	0	1	0	0	2	0	2	0	0	0	0	0	0	0	0	0	1	1	0	0
LYAR	LYAR	0.94	0.67	0	0	27	36	47	32	48	44	22	11	2	1	1	0	0	0	0	1	0	0	0
SARNP	SARNP	0	0	0	0	0	0	0	0	0	0	1	0	2	3	1	1	0	0	0	2	0	0	0
NUCKS1	NUCKS1	0	0	0	0	0	0	0	0	0	0	1	0	1	1	1	3	5	3	1	2	3	0	1
NCAPG	NCAPG	1.23	0.81	0	0	7	3	1	2	3	6	7	4	3	4	4	1	0	1	2	1	3	1	3
ZBTB21	ZBTB21	0.63	0.46	0	0	5	3	11	3	4	4	8	14	3	3	3	2	2	2	4	4	2	2	3
RNF213	RNF213	0	0	0	0	0	0	0	0	0	5	0	0	0	0	0	0	0	0	0	0	0	0	0
CCDC50	CCDC50	0	0	0	0	0	0	0	0	0	0	2	0	0	0	1	0	0	2	2	1	0	0	1
SYNM	SYNM	5.09	0.21	0	0	0	7	0	0	0	0	0	0	20	17	0	0	0	0	0	0	0	0	0
ZMYND8	ZMYND8	0	0	0	0	0	0	0	0	0	1	0	0	7	3	25	6	10	4	2	20	3	4	15
FLJ00010	FLJ00010	0	0	0	0	0	0	1	0	0	0	0	0	0	0	0	0	0	0	0	0	0	0	0
CXORF56	CXorf56	1	0.85	0	0	19	23	24	16	24	18	31	20	6	6	6	6	4	8	5	7	2	2	5
CXORF57	CXorf57	0	0	0	0	0	0	0	0	0	0	0	4	0	0	0	0	0	0	0	0	0	0	0
TBX6	TBX6	0	0	0	0	0	0	0	0	2	0	0	0	0	0	0	0	0	0	0	0	0	0	0
MAP1B	MAP1B	0	0	0	0	0	0	0	0	8	6	3	3	0	0	22	46	48	24	19	60	23	26	59
HELZ	HELZ	0.91	0.73	0	0	37	21	44	37	21	28	29	33	0	0	1	0	0	1	1	0	0	0	0
HABP4	HABP4	0	0	0	0	0	0	0	0	0	0	2	0	0	0	0	0	0	0	0	0	0	0	0
ICE2	ICE2	0.76	0.55	0	0	6	2	7	5	7	0	9	6	0	0	0	0	0	0	0	0	0	0	0
CRTC3	CRTC3	0	0	0	0	0	0	0	0	1	0	0	0	0	0	0	0	0	0	0	0	0	0	0
CC2D1A	CC2D1A	0	0	0	0	0	0	0	0	0	0	0	5	0	1	0	0	0	2	1	1	0	1	1
NOP14	NOP14	0.73	0.34	0	0	0	3	0	0	6	0	8	4	0	0	0	1	0	0	1	0	0	0	0
MATR3	MATR3	0.7	0.35	0	0	9	9	9	14	15	13	19	13	13	11	25	18	24	10	10	31	11	14	18
DDX1	DDX1	1.19	0.85	0	0	10	6	8	7	5	3	7	11	1	1	2	4	3	6	8	5	4	2	5
EIF5B	EIF5B	0.88	0.76	0	0	43	34	50	39	38	29	55	67	8	9	5	6	3	5	9	5	4	3	5
PRPF3	PRPF3	0	0	0	0	0	0	0	0	0	0	3	0	10	7	20	18	23	13	11	16	12	12	16
EIF5A	EIF5A	1.04	0.83	0	0	23	16	18	10	18	12	30	32	5	4	3	0	0	3	2	6	1	2	0
PPM1G	PPM1G	1.18	0.35	0	0	2	0	0	0	3	0	1	0	1	1	4	2	0	2	1	2	1	0	5
FUBP1	FUBP1	0	0	0	0	0	0	0	2	3	0	0	0	3	0	1	1	1	1	0	3	0	0	1
HSPH1	HSPH1	0.83	0.59	0	0	8	14	20	11	15	14	14	11	4	3	9	6	3	8	14	4	8	6	8
UBAP2L	UBAP2L	1.04	0.96	0	0	166	182	180	173	167	136	194	209	28	30	40	26	19	32	27	20	26	20	30
NONO	NONO	1.08	0.98	0	0	136	94	84	90	112	98	118	166	27	32	49	63	42	51	36	41	33	26	39
AHNAK	AHNAK	0.87	0.39	0	0	209	188	292	242	220	254	230	140	597	527	55	211	234	99	96	208	88	98	197
AFF4	AFF4	0.67	0.22	0	0	2	0	5	0	0	0	4	3	9	5	4	5	3	1	0	6	0	1	1
CDK2	CDK2	0	0	0	0	0	0	1	0	0	0	0	0	0	0	3	2	3	5	3	3	2	4	2
PDPN	PDPN	0	0	0	0	0	0	0	5	0	3	3	0	0	0	0	0	0	0	0	0	0	0	0
PRPF4	PRPF4	1.31	0.19	0	0	5	0	0	1	2	0	4	3	0	1	10	12	7	3	4	13	4	7	7
PC	PC	0.97	0.33	0	0	231	257	265	337	253	352	135	176	708	800	417	411	299	88	146	254	250	385	432
JUP	JUP	0.9	0.74	0	0	7	3	6	5	8	2	7	7	4	5	2	1	0	2	0	4	1	0	0
TOP2B	TOP2B	0	0	0	0	0	0	2	5	0	1	0	0	16	11	0	0	0	0	0	0	0	1	0
RBM33	RBM33	0.93	0.79	0	0	28	16	28	17	17	20	30	34	4	0	4	6	3	3	4	1	1	0	3
C11ORF98	C11ORF98	0	0	0	0	0	0	0	4	0	0	0	0	0	0	0	0	0	0	0	0	0	0	0
EEF1A2	EEF1A2	0	0	0	0	0	0	2	0	0	0	0	0	29	38	42	27	22	55	78	16	112	144	44
TAPBPL	TAPBPL	0	0	0	0	0	0	1	0	0	0	0	0	0	0	0	0	0	0	0	0	0	0	0
RBM39	RBM39	0.76	0.59	0	0	16	26	31	39	19	25	36	28	3	2	3	1	0	1	1	4	1	0	1
SURF6	SURF6	0	0	0	0	0	0	5	0	4	6	1	9	7	4	1	4	3	1	1	4	1	0	2
EIF3H	EIF3H	0.63	0.28	0	0	6	0	4	6	4	8	0	7	0	0	7	6	4	1	2	4	6	3	6
GSPT1	GSPT1	1.03	0.9	0	0	26	24	21	22	30	15	26	42	1	0	0	0	0	1	0	0	0	1	0
POM121	POM121	0.7	0.48	0	0	1	1	2	0	1	4	3	1	1	1	1	1	2	1	0	1	0	0	1
CORO6	CORO6	0	0	0	0	0	0	2	0	0	2	0	0	0	0	0	0	0	0	0	0	0	0	0
2017-09-09	2017-09-09	0.52	0.31	0	0	5	0	4	2	10	4	5	9	0	0	0	0	0	0	0	0	0	0	0
TUBB6	TUBB6	1.49	0.05	0	0	0	2	0	0	2	0	0	1	4	8	30	36	23	19	18	24	25	28	32
OR5L2	OR5L2	0	0	0	0	0	0	0	0	0	0	1	0	0	0	0	0	0	0	0	0	0	0	0
PARP1	PARP1	1.09	1.02	0	0	193	121	134	143	135	136	152	176	9	12	5	8	3	31	10	21	18	23	15
UBA6	UBA6	0	0	0	0	0	0	0	0	0	0	0	3	0	0	0	0	0	0	0	0	0	0	0
HCG_1985901	HCG_1985901	0.49	0.3	0	0	1	0	6	0	3	0	3	0	0	0	0	0	0	0	0	0	0	0	0
SFPQ	SFPQ	0.99	0.86	0	0	53	32	38	39	41	38	36	75	15	16	48	38	30	18	22	26	23	20	30
RSL1D1	RSL1D1	0.67	0.49	0	0	5	4	5	2	7	6	15	11	8	4	6	3	7	0	1	5	0	1	4
SUPT16H	SUPT16H	0.91	0.45	0	0	3	1	2	0	4	2	3	3	4	5	0	1	0	5	0	0	2	1	1
DMXL1	DMXL1	0	0	0	0	0	0	0	0	0	1	0	0	0	0	0	0	0	0	0	0	0	0	0
CCDC137	CCDC137	1.03	0.95	0	0	104	106	93	108	110	86	122	119	0	0	0	0	0	0	0	0	0	0	0
UBE2M	UBE2M	1.15	0.96	0	0	15	16	11	13	15	14	20	10	1	2	1	0	0	1	2	1	1	0	1
MRPS28	MRPS28	0	0	0	0	0	0	2	0	0	2	4	4	0	0	0	0	0	0	0	0	0	0	0
BTF3	BTF3	0.82	0.67	0	0	12	7	13	8	8	13	12	19	0	2	0	0	0	3	0	3	2	0	0
SLC3A2	SLC3A2	1.56	1.16	0	0	28	31	14	23	20	24	12	22	22	18	1	1	0	0	0	1	0	1	0
RAPH1	RAPH1	0.81	0.2	0	0	3	0	0	0	4	2	4	2	10	10	2	2	0	4	3	2	1	0	0
RPAP3	RPAP3	0.73	0.23	0	0	6	0	5	2	0	2	8	10	7	8	13	1	3	8	4	2	4	3	8
UBE2F	UBE2F;UBE2F-SCL...	0	0	0	0	0	0	0	0	0	0	2	0	0	0	0	0	0	0	0	0	0	0	0
EHBP1L1	EHBP1L1	0	0	0	0	0	0	0	0	0	0	0	4	0	0	0	0	0	0	0	0	0	0	0
EIF4EBP1	EIF4EBP1	1.2	0.88	0	0	29	35	19	17	17	27	45	48	0	0	0	0	0	0	0	1	0	0	0
STRN	STRN	0	0	0	0	0	0	0	0	0	0	3	0	0	0	4	0	0	0	1	0	0	0	0
KNOP1	KNOP1	1.11	0.87	0	0	8	11	10	7	6	6	14	12	7	9	1	1	1	0	0	7	1	0	1
PHF6	PHF6	0	0	0	0	0	0	0	0	0	0	6	3	1	0	1	0	0	1	0	0	0	0	0
RHPN2P1	RHPN2P1	0	0	0	0	0	0	0	0	1	0	3	0	0	0	0	0	0	0	0	0	0	0	0
AUTS2	AUTS2	1.47	1.35	0	0	1	0	0	0	0	0	0	0	0	0	0	0	0	0	0	0	0	0	0
NVL	NVL	1.36	0.99	0	0	6	6	5	2	0	4	7	9	1	0	5	4	2	3	1	2	1	0	2
PHF2	PHF2	0.56	0.28	0	0	2	0	6	0	0	0	9	0	0	0	0	1	0	0	1	1	0	0	0
PHF3	PHF3	0.98	0.52	0	0	12	7	5	0	9	7	25	17	19	11	11	3	10	2	4	11	4	5	11
BAG3	BAG3	0	0	0	0	0	0	0	2	0	0	0	3	6	3	0	0	0	5	2	0	0	1	0
RPP38	RPP38	0	0	0	0	0	0	0	0	0	0	2	1	1	1	0	1	0	1	0	0	0	0	0
NPM3	NPM3	1.48	0.28	0	0	2	0	1	0	0	0	0	1	2	2	4	6	5	2	2	3	2	1	2
EPS15L1	EPS15L1	1.11	0.38	0	0	14	7	11	5	15	10	4	12	25	25	17	12	10	23	12	27	11	10	15
RPS12	RPS12	1.11	0.25	0	0	6	2	5	0	4	2	8	2	0	1	10	3	11	14	4	23	5	5	9
DKFZP547J036	DKFZP547J036	0	0	0	0	0	0	0	0	0	1	5	0	0	0	0	0	0	0	0	0	0	0	0
ACTC1	ACTC1	0	0	0	0	0	0	0	0	6	0	0	0	18	16	24	35	38	25	17	31	13	12	30
INSIG1	INSIG1	0	0	0	0	0	0	0	0	4	0	0	0	0	0	0	0	0	0	0	0	0	0	0
NAMPT	NAMPT	0	0	0	0	0	0	0	0	1	0	0	0	0	0	3	5	3	7	7	5	3	7	3
PLEKHH2	PLEKHH2	0	0	0	0	0	0	1	0	0	0	0	0	0	0	0	0	0	0	0	0	0	0	0
RPS7	RPS7	1.33	0.12	0	0	1	5	3	0	0	2	7	2	6	4	18	11	12	11	22	8	17	23	18
KRT2	KRT2	0.84	0.68	0	0	147	95	132	179	164	156	103	134	6	17	15	7	5	2	2	6	1	1	10
KRT1	KRT1	1.03	0.83	0	0	288	145	175	217	357	144	159	218	14	20	25	20	8	11	5	18	10	6	19
RPS3	RPS3	0.5	0.03	0	0	0	1	4	0	2	5	0	1	6	6	39	38	32	37	29	27	32	36	34
RPS2	RPS2	0	0	0	0	0	0	0	1	4	1	0	2	3	3	14	14	10	10	12	7	11	16	12
KRT5	KRT4;KRT5	0.94	0.46	0	0	51	7	17	22	66	38	14	17	1	3	2	1	1	0	1	1	0	0	3
RPL36AL	RPL36AL	0.44	0.21	0	0	0	1	0	0	1	0	2	16	1	0	1	0	1	0	0	2	0	0	4
KRT9	KRT9	1.09	0.85	0	0	194	133	85	146	255	152	141	140	9	10	15	20	4	9	2	11	2	2	18
EIF3G	EIF3G	1.13	0.83	0	0	18	32	30	16	28	28	17	21	4	4	4	0	0	6	5	3	3	1	2
SH3GL1	SH3GL1	0.99	0.65	0	0	11	5	3	3	13	4	18	10	1	2	6	2	0	6	1	0	3	3	2
CHMP5	CHMP5	1.26	1.09	0	0	12	9	8	6	7	9	8	13	4	4	3	3	1	6	3	4	2	2	3
RPS8	RPS8	1.44	0.55	0	0	4	14	5	4	11	6	8	6	5	5	12	13	12	13	9	12	4	9	13
NUSAP1	NUSAP1	1.2	0.92	0	0	14	10	7	5	9	6	16	21	0	1	0	0	0	0	0	0	0	0	0
STRN3	STRN3	0.89	0.41	0	0	2	0	4	0	2	0	1	0	1	1	3	0	1	2	2	1	0	1	0
CTPS1	CTPS1	0.32	0.07	0	0	1	1	5	12	6	7	0	0	22	24	22	21	13	22	17	14	17	13	18
LGALSL	LGALSL	1	0.88	0	0	20	12	17	13	14	12	15	29	0	0	0	0	0	0	0	0	0	0	0
LOC402478	LOC402478	0	0	0	0	0	0	1	0	0	0	0	0	0	0	0	0	0	0	0	0	0	0	0
CAST	CAST	0.56	0.26	0	0	8	0	7	9	0	9	12	6	5	3	1	1	2	3	3	2	5	1	1
FHL1	FHL1	0.7	0.42	0	0	3	0	0	2	2	1	7	3	0	0	1	0	0	2	0	1	0	0	0
KRT6A	KRT6A	0	0	0	0	0	0	0	0	24	0	0	0	3	3	2	1	1	0	0	1	0	0	2
DSG1	DSG1	0	0	0	0	0	0	0	0	3	0	0	0	0	0	0	0	0	0	0	0	0	0	0
ERN1	ERN1	0	0	0	0	0	0	0	0	2	0	2	0	0	0	0	0	1	0	0	0	0	0	0
RPL36A	RPL36A	0.96	0.73	0	0	11	13	18	15	14	14	13	2	1	0	0	1	1	2	0	1	0	0	1
EPB41L2	EPB41L2	0.6	0.07	0	0	3	1	7	3	3	3	3	5	41	33	38	42	26	33	15	21	12	13	18
ACACA	ACACA	0.66	0.01	0	0	4	10	10	17	14	25	0	0	218	207	537	533	377	25	212	349	390	446	499
RPS23	RPS23	1.02	0.7	0	0	25	45	21	34	68	40	23	33	3	3	15	11	9	9	3	7	4	3	7
THRAP3	THRAP3	1.25	0.75	0	0	66	21	31	24	37	16	38	69	34	40	40	37	24	42	6	42	13	16	31
TRAPPC9	TRAPPC9	0	0	0	0	0	0	3	0	0	0	0	0	0	0	0	0	0	0	0	0	0	0	0
HSP90AA1	HSP90AA1	0.99	0.1	0	0	0	3	3	0	2	3	2	0	10	14	11	8	10	16	6	27	5	12	13
RPS28	RPS28	0	0	0	0	0	0	0	0	0	0	1	1	1	2	0	2	3	1	2	4	1	1	4
COPB2	COPB2	0	0	0	0	0	0	0	0	1	0	0	0	2	2	0	0	0	0	0	1	0	0	0
TPD52L2	TPD52L2	1.29	0.98	0	0	10	8	10	7	9	8	3	3	0	1	3	0	0	1	0	1	1	0	1
HTATSF1	HTATSF1	0	0	0	0	0	0	0	0	0	0	3	0	8	5	0	1	0	0	1	0	0	1	2
DNAJC8	DNAJC8	0.65	0.28	0	0	3	0	2	0	0	1	6	9	1	2	4	1	1	5	2	1	0	1	2
S100A7	S100A7	0	0	0	0	0	0	0	0	0	4	5	2	0	0	0	0	0	0	0	0	0	0	0
CCDC154	CCDC154	1.47	1.35	0	0	1	0	0	0	0	0	0	0	0	0	0	0	0	0	0	0	0	0	0
NUP50	NUP50	0.73	0.48	0	0	23	8	19	14	19	5	41	37	11	7	13	10	12	18	6	11	5	3	10
BMS1	BMS1	0	0	0	0	0	0	2	0	0	3	8	0	8	6	0	1	0	1	0	0	0	0	0
FAM192A	FAM192A	0	0	0	0	0	0	0	0	0	0	0	1	1	0	0	0	0	3	1	0	0	0	0
AIM1L	AIM1L	0	0	0	0	0	0	0	0	0	0	3	0	0	0	0	0	0	0	0	0	0	0	0
MARCKSL1	MARCKSL1	0.84	0.69	0	0	4	2	2	3	3	4	5	6	0	0	2	0	1	0	0	1	0	0	0
ERCC6L	ERCC6L	0	0	0	0	0	0	4	0	0	0	0	0	0	1	2	0	0	1	2	0	1	0	0
CDS2	CDS2	0	0	0	0	0	0	0	0	0	0	1	0	0	0	0	0	0	0	0	0	0	0	0
ASNS	ASNS	0.72	0.54	0	0	21	7	18	11	25	10	25	33	0	1	4	2	1	14	1	3	1	3	2
CHURC1	CHURC1	0	0	0	0	0	0	0	0	0	0	1	0	0	0	0	0	0	0	0	0	0	0	0
BOD1L1	BOD1L1	0	0	0	0	0	0	0	0	39	0	0	0	17	18	7	11	21	1	0	19	1	1	15
HN1	HN1	1.71	1.18	0	0	13	10	5	3	9	4	8	12	5	6	6	7	3	9	4	3	3	3	4
CAMSAP2	CAMSAP2	0	0	0	0	0	0	3	0	0	0	2	5	2	1	1	0	0	1	1	0	0	0	0
SRP68	SRP68	1.02	0.07	0	0	1	2	2	0	1	4	0	2	17	17	37	28	22	26	31	19	22	19	20
AP3S1	AP3S1	0.95	0.67	0	0	4	2	6	1	3	1	5	4	0	1	1	1	1	3	1	2	0	0	1
SON	SON	1	0.09	0	0	4	0	6	3	0	0	0	2	29	18	4	6	8	0	5	19	5	1	9
GATAD2B	GATAD2B	1.01	0.1	0	0	4	0	0	0	3	1	4	4	13	8	14	21	19	6	11	19	8	8	18
PCP2	PCP2	0	0	0	0	0	0	0	0	0	0	0	1	0	0	0	0	0	0	0	0	0	0	0
KIAA1211	KIAA1211	0	0	0	0	0	0	3	0	3	3	0	0	13	2	2	4	0	1	0	2	1	2	2
PPIA	PPIA	0	0	0	0	0	0	0	0	0	0	3	0	1	1	1	0	0	0	0	18	0	3	0
API5	API5	0.88	0.71	0	0	6	7	8	3	10	8	11	8	0	1	1	0	1	1	1	1	0	1	0
EFHD2	EFHD2	0.98	0.29	0	0	2	3	3	2	0	0	5	8	8	9	4	4	0	12	2	6	3	4	3
TMPO	TMPO	1.14	1.01	0	0	119	95	106	84	96	58	95	158	48	55	54	78	46	65	26	41	24	27	41
CAMSAP1	CAMSAP1	0.7	0.25	0	0	0	1	0	0	2	2	0	4	1	0	2	3	0	6	1	1	1	0	4
ROR2	ROR2	0	0	0	0	0	0	1	0	0	0	0	0	0	0	0	0	0	0	0	0	0	0	0
MCM3AP	MCM3AP	0	0	0	0	0	0	0	0	0	5	0	0	1	0	0	0	0	0	0	1	0	0	0
DDX47	DDX47	0.94	0.3	0	0	2	0	0	1	1	0	2	3	0	0	1	0	0	2	1	5	1	5	2
ANKHD1	ANKHD1	1.14	0.97	0	0	83	60	68	43	52	59	91	73	10	7	7	4	5	6	12	5	10	11	9
TTF2	TTF2	0.85	0.48	0	0	7	2	5	2	1	9	3	13	0	0	4	0	3	6	1	0	0	0	2
EIF5	EIF5	1.08	0.89	0	0	40	32	37	29	31	28	43	39	30	31	35	16	17	36	16	15	18	22	14
SND1	SND1	0.94	0.17	0	0	0	3	0	0	1	3	4	4	6	4	3	5	2	10	3	11	6	8	2
PEX19	PEX19	0.61	0.37	0	0	0	2	3	0	7	2	3	0	0	0	0	0	0	0	0	0	0	0	0
CORO1C	CORO1C	0	0	0	0	0	0	0	0	0	0	5	3	12	10	7	3	3	7	0	3	1	0	3
KIAA1524	KIAA1524	0.9	0.63	0	0	3	4	4	3	5	6	3	4	0	1	1	1	0	2	4	0	4	4	1
MAP7	MAP7	1.4	0.79	0	0	5	4	0	0	7	5	0	7	5	5	1	0	0	2	0	1	0	0	0
MAP4	MAP4	0.91	0.77	0	0	164	145	150	202	206	168	143	183	79	88	63	70	35	45	57	38	37	42	60
ZMYND11	ZMYND11	0	0	0	0	0	0	3	0	0	0	5	3	0	0	0	0	0	0	0	0	0	0	0
FMR1	FMR1	1.06	1.01	0	0	222	177	179	200	186	156	203	242	0	0	2	0	1	1	0	2	0	1	1
ANKRD17	ANKRD17	0.91	0.69	0	0	17	14	13	13	23	14	21	25	26	17	14	7	7	10	11	8	6	5	7
FBLL1	FBLL1	1.3	1.1	0	0	1	0	0	0	0	0	0	1	0	0	0	0	0	0	0	0	0	0	0
SPTBN1	SPTBN1	0	0	0	0	0	0	0	0	0	0	0	2	2	0	0	0	0	0	0	3	0	0	0
ANKRD11	ANKRD11	0	0	0	0	0	0	0	0	0	3	0	0	2	1	0	0	0	0	1	1	0	0	0
PAN3	PAN3	0	0	0	0	0	0	2	0	0	1	0	4	0	0	0	0	0	0	0	0	0	0	0
MINK1	MINK1	0	0	0	0	0	0	0	0	0	0	1	0	0	0	2	0	0	0	0	0	0	0	0
MAP6D1	MAP6D1	0	0	0	0	0	0	0	0	0	1	0	0	0	0	0	0	0	0	0	0	0	0	0
RPL28	RPL28	0.71	0.11	0	0	0	1	0	1	4	2	0	0	5	5	11	13	6	9	4	6	4	2	12
RPL24	RPL24	0.82	0.51	0	0	9	6	9	10	13	2	9	17	5	4	6	7	6	5	5	8	8	14	13
RPL27	RPL27	0.82	0.43	0	0	11	2	2	20	0	4	8	13	0	0	6	3	5	0	1	4	1	0	3
HCG_2039566	HCG_2039566	0	0	0	0	0	0	0	0	0	0	0	27	0	0	0	0	0	0	0	0	0	0	0
NAP1L4	NAP1L4	0.69	0.21	0	0	0	28	28	14	23	22	31	28	4	5	7	5	2	20	5	4	6	0	5
NSF	NSF	0.92	0.77	0	0	79	69	88	97	79	83	67	81	0	0	1	0	0	1	1	1	1	1	2
FAU	FAU	0.97	0.73	0	0	23	26	13	29	14	23	38	46	0	0	2	0	0	0	0	1	0	1	0
PRRC2C	PRRC2C	0.87	0.77	0	0	150	88	148	122	181	108	109	176	18	13	19	21	21	21	16	14	14	9	29
WDR36	WDR36	1.26	0.13	0	0	0	2	0	0	2	2	0	0	12	13	1	0	1	11	0	5	0	0	1
LLPH	LLPH	0.46	0.27	0	0	1	0	5	5	0	2	0	0	0	0	0	0	0	0	0	0	0	0	0
HNRNPA2B1	HNRNPA2B1	1.16	1	0	0	97	68	57	69	77	44	83	121	15	10	14	30	24	17	4	31	11	9	28
SPAG7	SPAG7	1.16	0.56	0	0	3	1	1	0	2	1	3	3	1	2	0	0	0	3	4	1	0	1	0
UBE2O	UBE2O	0	0	0	0	0	0	1	0	0	1	0	0	0	1	13	10	2	4	14	2	8	4	6
PPIG	PPIG	0	0	0	0	0	0	2	0	0	0	1	0	0	0	0	0	0	0	0	0	0	0	0
KMT2A	KMT2A	0	0	0	0	0	0	2	2	0	3	9	5	7	3	0	3	8	0	0	8	1	0	4
ANXA2	ANXA2	0.92	0.85	0	0	64	42	52	56	68	43	65	74	25	35	4	2	5	10	7	9	1	6	5
ZNF281	ZNF281	1.47	0.14	0	0	1	0	0	0	0	0	0	0	12	6	8	8	6	4	4	3	3	4	4
PUS7	PUS7	0	0	0	0	0	0	0	0	0	0	0	4	1	4	0	2	0	4	0	0	0	0	1
SERBP1	SERBP1	1.13	0.94	0	0	119	93	74	75	95	59	123	174	36	43	52	72	30	73	21	41	13	13	48
GLTSCR2	GLTSCR2	0.84	0.35	0	0	4	0	0	2	0	0	7	7	3	1	2	2	3	2	3	2	0	1	1
DDX39B	DDX39B	0	0	0	0	0	0	0	0	0	0	1	0	9	9	5	10	8	11	6	17	8	12	8
PCNP	PCNP	1.29	0.79	0	0	20	13	9	3	10	12	20	27	9	13	12	22	9	16	5	7	3	4	11
IK	IK	1.01	0.85	0	0	24	36	33	19	29	26	43	43	8	7	2	8	4	11	2	6	1	1	3
EZR	EZR	2.75	0.13	0	0	0	3	0	0	0	0	0	0	13	11	11	1	2	14	10	3	2	1	1
PPP6R3	PPP6R3	0	0	0	0	0	0	0	2	0	0	0	0	7	9	4	1	0	6	2	2	1	0	1
TP53BP2	TP53BP2	0	0	0	0	0	0	1	0	3	1	4	5	1	2	10	5	2	13	4	5	2	0	5
MCDRH	MCDRH	0	0	0	0	0	0	1	0	0	0	0	0	0	0	0	0	0	0	0	0	0	0	0
GFPT2	GFPT2	1.24	1	0	0	1	1	1	1	0	0	1	1	0	0	0	0	0	0	0	0	0	0	0
MIDN	MIDN	0	0	0	0	0	0	0	0	2	0	0	0	0	0	0	0	0	0	0	0	0	0	0
DNAJB4	DNAJB4	1.07	0.81	0	0	1	0	1	0	0	1	0	0	0	0	0	0	0	0	0	0	0	0	0
HS1BP3	HS1BP3	0.79	0.56	0	0	0	1	1	0	0	2	1	2	0	0	0	0	0	1	0	0	0	0	0
SRRM1	SRRM1	0.67	0.31	0	0	1	6	0	0	3	6	19	13	5	3	1	0	3	0	0	7	0	0	1
PDCD5	PDCD5	0	0	0	0	0	0	0	0	0	0	1	0	2	2	3	2	0	9	5	6	6	6	3
SRRM2	SRRM2	0.85	0.25	0	0	4	10	13	12	4	9	10	5	34	29	2	6	16	0	3	18	2	0	15
RPA1	RPA1	1.39	0.85	0	0	6	6	2	2	2	3	3	16	1	0	1	0	0	5	0	2	0	0	0
ISPD	ISPD	0	0	0	0	0	0	1	6	0	0	0	0	0	0	0	0	0	0	0	0	0	0	0
RPS9	RPS9	0	0	0	0	0	0	0	0	4	0	0	0	1	3	15	13	10	9	3	8	5	6	7
CFDP1	CFDP1	1.49	1.03	0	0	14	8	11	3	3	4	9	15	0	3	5	1	0	4	1	4	0	2	1
MAPT	MAPT	0.54	0.29	0	0	4	0	5	0	2	5	5	10	0	0	2	0	0	5	0	0	0	0	1
CKAP2	CKAP2	0.96	0.6	0	0	11	5	0	4	12	4	17	17	0	0	1	3	2	2	1	3	0	0	1
SPOCD1	SPOCD1	0	0	0	0	0	0	0	0	0	0	0	1	0	0	0	0	0	0	0	0	0	0	0
UFD1L	UFD1L	0	0	0	0	0	0	0	0	0	0	4	4	0	0	3	0	1	1	1	0	2	1	1
ILF3	ILF3	1.19	0.82	0	0	11	8	11	3	12	0	14	11	8	8	6	5	3	2	1	11	3	4	7
CKAP5	CKAP5	0.75	0.13	0	0	5	6	7	4	19	13	0	4	32	20	34	21	23	15	45	25	23	30	36
PARG	PARG	0	0	0	0	0	0	0	0	2	0	0	0	0	0	1	0	1	1	0	0	0	0	1
NMT1	NMT1	1.37	0.68	0	0	1	6	4	1	1	0	5	6	2	2	4	1	0	4	1	1	2	0	1
TMOD3	TMOD3	1.12	0.35	0	0	5	0	0	3	0	1	1	8	0	1	3	0	0	7	1	3	1	0	2
ZRANB2	ZRANB2	1.25	0.9	0	0	11	7	5	3	11	3	13	10	2	0	0	1	0	0	0	0	0	0	0
CALM1	CALM1;CALM2;CAL...	0	0	0	0	0	0	0	0	0	0	0	1	0	0	2	1	0	1	0	0	0	1	1
PARN	PARN	0.9	0.51	0	0	1	0	1	0	0	0	2	1	0	0	0	0	0	2	0	1	0	0	0
LYPLA2	LYPLA2	0.86	0.1	0	0	1	0	3	1	0	0	0	0	2	6	6	2	3	12	10	6	5	7	3
TEX264	TEX264	1.47	1.04	0	0	1	0	0	0	0	0	0	0	0	0	0	0	0	0	0	1	0	0	0
CHMP2B	CHMP2B	1.12	0.66	0	0	6	4	1	5	8	0	3	12	1	2	6	3	1	6	2	2	2	1	4
PUF60	PUF60	1.11	0.07	0	0	1	0	0	0	0	0	2	0	15	17	12	12	10	20	11	17	6	9	8
DHX16	DHX16	0	0	0	0	0	0	2	0	1	0	6	4	0	1	0	0	1	0	0	0	0	0	0
OR5F1	OR5F1	1.47	1.35	0	0	1	0	0	0	0	0	0	0	0	0	0	0	0	0	0	0	0	0	0
DHX15	DHX15	0.53	0.16	0	0	3	1	3	1	4	4	9	8	9	8	15	14	12	15	7	16	10	10	13
S100A11	S100A11	0	0	0	0	0	0	0	0	1	0	1	1	1	1	0	0	0	2	0	1	0	0	0
AKAP17A	AKAP17A	0	0	0	0	0	0	4	0	0	6	0	3	1	0	0	0	0	0	2	3	0	1	1
BOC	BOC	0	0	0	0	0	0	0	0	0	0	0	2	0	0	0	0	0	0	0	0	0	0	0
PLIN3	PLIN3	0	0	0	0	0	0	0	0	1	0	0	0	14	15	4	3	0	13	3	3	1	3	0
ZYX	ZYX	1.05	0.88	0	0	26	28	27	20	33	13	28	46	6	4	4	2	2	16	3	1	0	2	1
NHLRC2	NHLRC2	0.98	0.86	0	0	206	221	219	239	221	229	194	262	0	0	1	0	0	2	0	1	0	0	0
TPX2	TPX2	0.82	0.57	0	0	45	21	39	31	26	27	53	76	25	31	22	41	37	46	12	39	9	12	26
AHCYL1	AHCYL1	0	0	0	0	0	0	0	0	0	0	2	0	0	1	2	0	0	5	1	1	2	1	1
NBPF9	NBPF9	0	0	0	0	0	0	0	0	0	0	0	5	0	0	0	0	0	0	0	0	0	0	0
RBPJ	RBPJ	1.47	1.35	0	0	1	0	0	0	0	0	0	0	0	0	0	0	0	0	0	0	0	0	0
CIAPIN1	CIAPIN1	1.17	0.47	0	0	0	7	3	4	1	3	4	5	4	5	5	1	1	5	2	2	0	0	1
FAM193A	FAM193A	0	0	0	0	0	0	3	0	0	0	2	0	0	0	0	0	0	0	1	0	0	0	0
HSP90AB1	HSP90AB1	0.33	0.08	0	0	7	0	18	12	21	14	0	4	31	27	17	18	11	28	14	24	13	21	16
LIG3	LIG3	0	0	0	0	0	0	0	0	0	0	0	1	0	0	0	0	0	1	0	2	2	1	2
PTBP1	PTBP1	0.94	0.79	0	0	26	31	27	24	26	26	48	46	12	10	8	4	2	5	1	26	0	2	3
KIFC1	KIFC1	0	0	0	0	0	0	0	0	0	0	3	3	2	2	2	1	1	3	1	1	0	0	2
PYGL	PYGL	0	0	0	0	0	0	0	0	0	6	0	0	0	0	0	0	0	1	0	1	0	0	0
EIF3CL	EIF3CL	0.91	0.79	0	0	15	10	14	13	18	13	16	9	4	4	9	5	13	6	8	7	6	4	10
DDX3X	DDX3X	0.99	0.9	0	0	95	69	82	97	86	62	79	109	18	17	26	30	14	38	31	21	21	25	19
RFC1	RFC1	0.86	0.25	0	0	11	0	9	8	2	0	8	11	15	12	0	0	0	0	1	1	2	2	1
SPAG9	SPAG9	0	0	0	0	0	0	0	0	0	3	0	0	2	2	26	12	12	11	12	12	7	13	18
TDRD3	TDRD3	0.44	0.33	0	0	5	5	20	9	9	5	18	20	9	6	1	0	0	1	1	0	0	2	1
PRRC2B	PRRC2B	0.97	0.7	0	0	11	7	13	4	4	7	15	16	1	1	2	0	3	1	1	1	1	0	1
PRRC2A	PRRC2A	0.8	0.7	0	0	186	115	222	197	203	130	166	248	8	4	18	21	18	12	13	14	11	4	10
SAFB	SAFB	1.09	0.19	0	0	5	0	5	0	0	0	0	9	16	10	1	3	2	6	2	3	1	4	3
RANGAP1	RANGAP1	0	0	0	0	0	0	0	0	1	0	0	0	32	32	38	32	39	50	51	40	37	30	37
LSG1	LSG1	0.73	0.25	0	0	4	0	1	0	1	0	4	15	6	5	1	0	0	2	1	0	0	0	0
PIN4	PIN4	0	0	0	0	0	0	0	0	0	0	1	0	1	1	0	1	0	1	0	2	0	0	0
CHAMP1	CHAMP1	1.48	0.26	0	0	6	3	2	0	4	0	6	6	14	8	22	13	13	14	12	16	7	9	18
KIF5B-RET	KIF5B-RET	0	0	0	0	0	0	0	0	0	3	0	0	0	0	0	0	0	0	0	0	0	0	0
CWC15	CWC15	0.79	0.19	0	0	4	0	0	0	3	3	3	8	5	7	3	6	2	13	5	4	2	2	3
PPP2R3A	PPP2R3A	0	0	0	0	0	0	0	2	0	0	0	0	0	0	0	0	0	0	0	0	0	0	0
H2AFV	H2AFV	2.12	0.31	0	0	4	2	0	0	0	0	4	2	4	3	6	9	7	5	7	12	7	9	9
TWF2	TWF2	0	0	0	0	0	0	2	0	0	0	2	0	1	0	0	0	0	1	0	0	0	0	0
PTMA	PTMA	0	0	0	0	0	0	0	0	3	0	0	0	0	0	0	0	0	0	0	1	0	0	0
RPS6	RPS6	1.44	0.32	0	0	7	3	3	1	10	0	2	4	4	4	15	12	14	13	12	10	9	10	11
EIF4G3	EIF4G3	0	0	0	0	0	0	7	0	7	0	0	0	3	5	18	20	8	13	16	14	14	12	14
EIF4G2	EIF4G2	0.79	0.62	0	0	63	57	84	81	110	87	48	56	18	16	5	2	0	7	7	4	1	3	0
EIF4G1	EIF4G1	1.27	0.89	0	0	72	66	74	0	94	63	58	49	46	43	78	69	37	49	39	57	27	25	50
H2AFX	H2AFX	0	0	0	0	0	0	1	0	0	0	1	0	4	3	6	9	10	10	14	25	24	14	14
TNIK	TNIK	0.68	0.32	0	0	7	0	8	0	3	4	8	10	0	0	3	0	0	2	0	0	1	0	0
CD2AP	CD2AP	0.76	0.25	0	0	27	13	25	12	29	13	35	55	31	39	77	72	47	77	43	33	38	29	58
PPIP5K2	PPIP5K2	0	0	0	0	0	0	1	0	0	0	0	0	0	0	1	0	0	0	0	0	0	0	0
DDX5	DDX5	1	0.79	0	0	25	24	35	30	9	21	23	35	12	12	12	7	7	11	5	11	5	5	7
DDX6	DDX6	0.88	0.56	0	0	4	2	5	0	4	3	6	4	1	0	8	1	1	4	2	3	1	0	1
TRG14	TRG14	0	0	0	0	0	0	0	0	0	0	8	0	0	0	0	0	0	0	0	0	0	0	0
XRN1	XRN1	0.75	0.56	0	0	17	18	42	27	19	22	13	23	13	10	24	13	7	19	10	7	12	11	9
XRN2	XRN2	0	0	0	0	0	0	0	0	0	0	1	2	0	1	7	1	2	4	4	2	2	0	0
SGO2	SGO2	0	0	0	0	0	0	0	0	0	0	0	2	0	0	0	0	0	0	0	0	0	0	0
PSMC5	PSMC5	0	0	0	0	0	0	3	0	0	2	1	1	0	2	3	1	3	2	2	5	2	2	4
ELP4	ELP4	0.96	0.73	0	0	27	12	24	9	32	15	17	28	16	11	10	1	1	7	11	5	7	8	3
TNFRSF10D	TNFRSF10D	1.47	1.35	0	0	1	0	0	0	0	0	0	0	0	0	0	0	0	0	0	0	0	0	0
STMN1	STMN1	1.02	0.75	0	0	25	9	16	9	17	13	21	26	1	3	8	9	13	18	3	9	1	2	3
CTNND1	CTNND1	0.58	0.43	0	0	3	4	9	8	4	4	9	9	9	9	1	0	0	1	2	0	0	0	0
RPL8	RPL8	0.41	0.14	0	0	0	1	2	3	6	2	1	3	0	2	10	8	4	5	4	5	9	5	6
RPL9	RPL9	1.33	0.98	0	0	7	19	8	10	12	7	14	13	8	6	13	9	6	5	5	8	5	6	5
RPL6	RPL6	0	0	0	0	0	0	0	0	2	0	0	0	22	16	17	9	19	17	8	15	8	7	15
RPL7	RPL7	0.91	0.19	0	0	0	5	2	0	16	1	1	0	0	1	10	8	6	10	5	13	6	6	7
RPL4	RPL4	0.99	0.84	0	0	40	43	32	41	35	52	48	56	3	3	13	13	16	8	12	7	14	11	14
RPL5	RPL5	1.41	0.92	0	0	32	40	17	4	38	14	49	48	8	5	8	7	15	13	5	4	7	5	11
PABPC4	PABPC4	0.97	0.74	0	0	32	23	31	39	40	20	20	21	3	4	12	9	7	5	7	10	3	7	6
RPL3	RPL3	0.67	0.12	0	0	0	5	3	2	6	6	8	4	4	4	19	20	20	17	9	7	6	7	18
NFKBIE	NFKBIE	0.65	0.47	0	0	8	8	15	20	7	16	7	12	0	0	0	0	0	0	0	0	0	0	0
SUMO2	SUMO2	0	0	0	0	0	0	3	0	4	1	0	0	2	2	0	1	0	2	0	2	0	0	1
NEBL	NEBL	1.15	0.83	0	0	17	13	18	10	0	10	20	24	0	0	1	0	0	0	0	0	0	0	1
FEN1	FEN1	0.51	0.33	0	0	8	5	14	2	10	5	24	36	7	9	5	6	2	8	4	7	2	5	4
DCP1A	DCP1A	1.19	0.37	0	0	2	1	1	1	1	3	0	0	3	1	3	3	3	5	2	3	2	4	5
FLG	FLG	0	0	0	0	0	0	0	0	0	0	0	2	0	0	0	0	0	0	0	0	0	0	0
UBAP2	UBAP2	1	0.87	0	0	73	52	80	47	63	44	76	82	10	11	15	7	1	7	4	2	6	3	10
CHD3	CHD3	0	0	0	0	0	0	0	0	0	1	0	0	33	26	24	22	25	8	13	30	13	12	22
CDV3	CDV3	0.88	0.77	0	0	20	12	17	12	27	15	18	25	2	4	1	4	1	7	1	1	0	0	1
CHD4	CHD4	1.1	0.95	0	0	286	326	264	315	331	271	243	313	105	93	102	102	99	38	71	90	64	53	83
HAUS8	HAUS8	0.75	0.16	0	0	0	2	4	0	0	1	2	5	0	0	8	2	2	1	10	6	6	6	7
TRAP1	TRAP1	1.15	0.19	0	0	0	8	0	9	0	5	6	2	1	1	6	6	7	20	8	13	7	6	5
HAUS6	HAUS6	0	0	0	0	0	0	3	4	0	4	0	0	8	7	8	5	5	9	10	9	6	3	11
TUBA1B	TUBA1B	1.02	0.23	0	0	49	60	62	54	67	60	46	43	52	64	137	120	93	229	137	121	158	144	140
PUM2	PUM2	0	0	0	0	0	0	3	0	5	4	0	0	0	0	0	0	0	0	0	0	0	0	0
NEMP2	NEMP2	1.16	0.92	0	0	1	0	0	0	0	0	0	2	0	0	0	0	0	0	0	0	0	0	0
HAUS2	HAUS2	0	0	0	0	0	0	0	1	0	0	0	0	0	0	2	0	0	0	5	0	2	4	0
UBA52	UBA52	0	0	0	0	0	0	0	0	2	0	0	0	0	0	1	0	0	1	0	2	0	0	1
RPL34	RPL34	0.85	0.52	0	0	3	1	1	7	0	1	1	5	1	1	2	0	1	0	1	1	1	1	1
PPME1	PPME1	0	0	0	0	0	0	2	2	0	0	1	0	4	5	0	0	0	0	0	0	0	0	0
AKT1S1	AKT1S1	0	0	0	0	0	0	0	1	0	0	0	0	0	0	0	0	0	0	0	0	0	0	0
PCBP2	PCBP2	1.06	0.98	0	0	57	48	42	52	53	47	51	63	10	12	17	18	13	26	17	14	13	16	15
PPP1R12A	PPP1R12A	1.46	0.59	0	0	9	2	4	3	2	3	0	9	6	4	9	6	3	7	3	2	4	1	7
PCBP1	PCBP1	0.69	0.66	0	0	22	14	26	25	29	19	30	34	8	13	10	9	15	15	11	16	9	11	11
UBXN6	UBXN6	0	0	0	0	0	0	0	0	0	0	5	0	0	0	0	0	0	5	0	0	0	0	0
FLYWCH2	FLYWCH2	1	0.76	0	0	9	7	4	5	10	5	12	16	1	1	0	2	0	3	0	1	0	1	0
ZFC3H1	ZFC3H1	0	0	0	0	0	0	0	0	0	0	5	0	1	0	0	0	2	0	0	1	0	0	1
TOP2A	TOP2A	0.81	0.1	0	0	13	0	11	7	0	8	8	12	51	40	0	0	0	8	1	2	3	3	0
TTC4	TTC4	0	0	0	0	0	0	1	0	0	0	3	7	0	0	0	0	0	0	0	0	0	0	0
SDAD1	SDAD1	0	0	0	0	0	0	1	0	0	0	1	0	0	0	1	0	0	0	0	0	0	0	0
NHSL1	NHSL1	0	0	0	0	0	0	0	0	0	0	5	0	0	0	0	0	0	0	0	0	0	0	0
ARPC5	ARPC5	0	0	0	0	0	0	0	0	1	0	0	1	0	0	0	0	0	0	0	0	0	0	0
PSME3	PSME3	0	0	0	0	0	0	1	0	1	0	0	0	8	9	15	9	4	6	11	5	13	10	8
RPL39P5	RPL39P5	0.71	0.6	0	0	4	3	4	5	10	4	5	5	0	0	0	0	0	0	0	0	0	0	0
KIAA1429	KIAA1429	0	0	0	0	0	0	2	0	0	0	0	0	0	0	0	0	0	0	2	0	1	0	0
DYNC1LI1	DYNC1LI1	0.6	0.36	0	0	0	1	0	2	0	4	3	0	0	0	0	0	0	0	0	0	0	0	1
HIST1H2BB	HIST1H2BB	0.71	0.15	0	0	108	2	97	144	68	1	2	134	15	15	14	26	22	32	26	46	48	31	65
HIST1H2BL	HIST1H2BL	18.81	0.12	0	0	0	56	0	0	0	0	0	6	16	16	13	30	23	32	27	47	53	36	66
HIST1H2BM	HIST1H2BM	0	0	0	0	0	0	0	0	5	65	133	0	16	16	13	30	23	32	27	47	53	36	66
SART1	SART1	1.31	0.85	0	0	35	26	29	5	22	6	42	48	31	28	15	9	6	8	6	8	4	3	9
UQCRFS1	UQCRFS1	0	0	0	0	0	0	0	9	0	0	0	0	0	0	0	0	0	0	0	0	0	0	0
TAF2	TAF2	1.11	0.86	0	0	1	0	0	0	0	0	2	0	0	0	0	0	0	0	0	0	0	0	0
IPO5	IPO5	0	0	0	0	0	0	2	0	0	0	0	0	0	0	0	0	0	0	2	3	1	1	0
CDC27	CDC27	0.79	0.53	0	0	5	4	11	8	9	0	8	0	1	0	6	1	4	0	0	4	0	2	3
AP1G1	AP1G1	0	0	0	0	0	0	0	0	4	5	0	0	0	0	0	0	0	0	0	0	0	0	0
ARPP19	ARPP19	0	0	0	0	0	0	0	0	0	0	5	1	0	0	0	0	0	0	0	0	0	0	0
NUP153	NUP153	1.23	1.1	0	0	72	57	55	39	65	37	65	67	40	40	25	36	31	28	19	25	14	9	30
RBM27	RBM27	0.95	0.15	0	0	0	8	9	0	0	5	15	0	22	23	9	9	3	4	8	3	5	4	3
RBM25	RBM25	1.04	0.86	0	0	16	8	8	14	8	10	12	18	9	6	6	5	2	0	3	7	3	0	7
STON2	STON2	0	0	0	0	0	0	1	0	0	0	0	0	0	0	0	0	0	0	0	0	0	0	0
SNCA	SNCA	0.76	0.26	0	0	5	0	0	0	0	2	12	8	0	1	1	2	1	6	0	2	0	1	0
IPO7	IPO7	0	0	0	0	0	0	0	1	2	0	0	1	4	11	4	0	0	2	1	1	0	0	0
LIN54	LIN54	0.98	0.58	0	0	0	1	0	0	0	0	3	1	1	0	1	0	0	0	0	0	0	0	0
CFAP97	CFAP97	0.96	0.7	0	0	1	0	0	0	0	0	0	4	0	0	0	0	0	0	0	0	0	0	0
VBP1	VBP1	2.08	0.71	0	0	5	3	2	1	0	1	2	3	0	0	4	0	0	9	2	2	0	2	1
SRSF4	SRSF4	1.53	0.21	0	0	2	0	0	0	0	0	0	2	4	1	6	2	8	0	0	7	0	0	2
NBPF10	NBPF10;NBPF20;N...	0	0	0	0	0	0	0	8	3	0	0	0	0	0	0	0	0	0	0	0	0	0	0
COPS8	COPS8	1.06	0.77	0	0	9	5	9	3	12	6	3	7	0	0	0	0	0	0	0	0	0	0	0
BRD1	BRD1	0	0	0	0	0	0	0	0	0	3	0	0	0	0	0	0	0	0	0	0	0	0	0
ECHDC1	ECHDC1	0	0	0	0	0	0	0	0	0	0	0	1	0	0	0	0	0	1	0	0	0	0	0
HNRNPH1	HNRNPH1	1.26	0.96	0	0	36	24	33	23	18	8	23	45	4	3	8	8	14	7	8	14	9	7	12
HNRNPH3	HNRNPH3	0	0	0	0	0	0	0	0	0	0	0	2	0	0	0	1	1	1	0	3	2	1	1
HNRNPH2	HNRNPH2	3.92	0.28	0	0	0	5	0	0	0	0	0	0	2	2	5	5	6	3	4	8	4	4	9
MGA	MGA	1.19	0.23	0	0	6	0	7	0	6	0	0	0	2	0	4	3	12	2	3	10	0	1	5
GPKOW	GPKOW	0	0	0	0	0	0	1	0	0	0	0	0	1	4	1	1	0	5	1	3	1	1	2
PAXBP1	PAXBP1	0	0	0	0	0	0	0	0	0	0	0	5	1	1	8	4	0	3	8	6	5	3	1
NCOR1	NCOR1	0.61	0.36	0	0	0	6	9	4	6	5	7	7	4	2	0	2	1	1	1	3	1	2	3
ADNP	ADNP	0.87	0.15	0	0	15	3	7	5	14	7	14	16	50	43	31	40	48	19	19	32	11	16	33
AAK1	AAK1	0.79	0.4	0	0	0	1	0	0	0	0	3	4	0	0	0	0	0	2	1	0	0	0	0
IFI44L	IFI44L	0	0	0	0	0	0	1	0	3	0	0	0	0	0	0	0	0	0	0	0	0	0	0
AVEN	AVEN	0	0	0	0	0	0	0	0	0	0	4	4	0	0	0	0	0	0	0	0	0	0	0
POLDIP3	POLDIP3	0.71	0.61	0	0	30	36	53	36	40	39	68	65	2	0	3	3	3	8	0	6	3	0	2
CALD1	CALD1	1.06	0.28	0	0	18	12	11	10	15	8	22	24	74	53	28	7	7	19	1	5	1	3	11
HNRNPR	HNRNPR	0	0	0	0	0	0	1	0	0	2	2	0	6	7	5	3	8	4	1	15	5	3	4
AFMID	AFMID	0	0	0	0	0	0	0	0	0	2	0	0	0	0	0	0	0	0	0	0	0	0	0
HNRNPU	HNRNPU	1.24	1.02	0	0	85	87	66	87	76	77	54	64	20	20	32	53	45	36	22	28	25	25	37
HIST2H2AC	HIST2H2AC	0	0	0	0	0	0	0	0	15	0	0	0	10	7	16	23	16	23	21	27	35	23	24
HNRNPK	HNRNPK	1.01	0.94	0	0	86	68	83	64	86	60	80	106	29	33	21	39	26	30	29	38	25	23	27
HNRNPL	HNRNPL	1.04	0.56	0	0	24	13	12	13	13	10	24	42	22	18	11	18	17	15	19	22	25	16	20
HNRNPM	HNRNPM	1.17	0.94	0	0	61	93	77	56	89	71	63	61	16	11	21	11	25	15	8	29	4	7	12
GPN1	GPN1	1.27	0.66	0	0	1	0	0	0	0	0	1	0	0	0	0	0	0	2	0	0	0	0	0
SAP30BP	SAP30BP	0.34	0.2	0	0	1	1	4	5	5	2	10	4	5	1	5	6	1	10	4	3	2	3	3
PDCD4	PDCD4	1.08	0.59	0	0	7	2	3	0	2	0	10	12	0	0	2	2	1	3	0	0	0	1	1
TES	TES	0	0	0	0	0	0	0	0	0	0	2	5	1	0	1	2	1	3	0	0	0	0	1
HNRNPD	HNRNPD	1.14	1	0	0	21	21	17	14	17	14	24	32	7	5	9	6	5	5	2	8	2	1	5
RPL27A	RPL27A	1.25	0.98	0	0	7	11	6	10	6	7	5	11	0	0	2	5	1	2	5	3	4	3	5
HNRNPF	HNRNPF	1.04	0.84	0	0	23	17	16	13	13	19	26	34	8	5	12	10	11	8	7	20	8	8	11
CNGB1	CNGB1	0	0	0	0	0	0	0	0	0	0	2	0	0	0	0	0	0	0	0	0	0	0	0
HELLS	HELLS	0	0	0	0	0	0	0	2	0	0	0	0	2	2	0	0	0	0	0	3	0	0	1
NIFK	NIFK	0.79	0.67	0	0	10	6	8	8	9	7	17	16	0	0	0	0	0	0	0	0	0	0	0
MACF1	DST;MACF1	4.28	0.18	0	0	7	0	0	0	0	0	0	0	0	1	10	4	7	3	12	4	6	11	11
SREK1IP1	SREK1IP1	0.89	0.72	0	0	3	3	2	4	4	5	4	2	0	0	0	0	0	0	0	0	0	0	0
PRUNE	PRUNE	0	0	0	0	0	0	0	0	0	0	1	0	0	0	4	2	0	4	0	0	1	2	0
RPL31	RPL31	1.08	0.33	0	0	2	0	2	0	0	0	2	1	0	0	3	2	1	3	3	2	2	3	4
MAST4	MAST4	0	0	0	0	0	0	0	4	0	0	0	0	0	0	1	0	0	0	0	0	0	0	0
PCMT1	PCMT1	0.39	0.23	0	0	2	0	7	0	4	0	5	10	1	0	0	0	0	1	0	0	0	0	0
HDLBP	HDLBP	1.15	1	0	0	105	107	108	68	110	75	118	100	27	22	27	23	7	24	22	11	8	16	9
DHRS3	DHRS3	1.47	1.35	0	0	1	0	0	0	0	0	0	0	0	0	0	0	0	0	0	0	0	0	0
DDX21	DDX21	1.13	1	0	0	68	45	48	47	34	41	60	80	20	18	20	26	21	32	19	34	11	18	23
EEF1B2	EEF1B2	0.49	0.18	0	0	0	2	8	0	2	7	0	2	2	3	3	5	3	2	6	5	5	8	3
FERMT2	FERMT2	1.23	0.4	0	0	4	2	2	0	0	0	8	5	7	10	1	1	0	4	0	1	0	0	1
TCEAL1	TCEAL1	0	0	0	0	0	0	0	0	0	0	0	2	0	0	0	0	0	0	0	0	0	0	0
GGA2	GGA2	1.47	0.98	0	0	1	0	0	0	0	0	0	0	0	0	0	0	0	1	0	0	0	0	0
BCOR	BCOR	3.38	0.24	0	0	0	5	0	0	0	0	1	0	2	1	7	9	10	3	2	9	2	2	9
HIST1H1D	HIST1H1D	1.03	0.1	0	0	4	2	3	1	10	1	0	3	7	4	20	38	32	19	7	22	23	14	28
HIST1H1E	HIST1H1E	1.09	0.84	0	0	74	28	39	21	59	42	47	80	9	6	32	47	37	21	13	26	26	17	32
MMTAG2	C1orf35	0.98	0.79	0	0	7	8	7	9	11	8	3	10	0	0	0	0	2	0	0	3	0	0	1
WAPL	WAPAL	1.08	0.54	0	0	9	16	12	17	10	15	8	10	23	24	15	13	10	8	11	12	4	4	5
AP3D1	AP3D1	0.48	0.23	0	0	1	3	6	3	12	6	4	2	2	5	15	5	2	5	2	11	2	2	5
HIST1H1C	HIST1H1C	0.43	0.15	0	0	10	6	7	70	8	9	4	17	10	6	40	51	36	25	10	32	31	23	40
EPB41L3	EPB41L3	0	0	0	0	0	0	0	0	2	0	0	0	2	0	66	48	31	72	21	47	21	21	39
STAU1	STAU1	1.4	0.85	0	0	30	14	17	25	0	15	31	0	1	0	1	0	2	4	3	4	0	2	0
YTHDC2	YTHDC2	0	0	0	0	0	0	0	7	12	0	0	5	9	5	5	2	2	6	3	2	2	2	3
ITFG2	ITFG2	0	0	0	0	0	0	0	0	1	0	0	0	0	0	0	0	0	0	0	0	0	0	0
GPBP1L1	GPBP1L1	0	0	0	0	0	0	0	0	0	0	1	0	0	0	0	0	0	0	0	0	0	0	0
EMILIN1	EMILIN1	0	0	0	0	0	0	0	0	1	0	0	0	0	0	0	0	0	0	0	0	0	0	0
IGF2BP2	IGF2BP2	0	0	0	0	0	0	0	0	0	0	0	2	0	0	0	2	3	7	4	2	4	3	2
DDX24	DDX24	0	0	0	0	0	0	7	0	0	0	0	0	0	0	1	0	1	2	1	4	0	1	1
EXOSC9	EXOSC9	0	0	0	0	0	0	0	0	0	0	2	0	1	3	2	1	2	1	1	3	2	2	2
CAPZA1	CAPZA1	0	0	0	0	0	0	0	0	0	0	1	0	2	1	9	16	10	15	13	15	16	9	19
TAB2	TAB2	0	0	0	0	0	0	0	0	0	0	1	1	0	0	0	1	0	1	0	0	0	0	1
SLC25A31	SLC25A31	0	0	0	0	0	0	3	0	0	0	0	0	4	5	7	8	6	6	4	6	5	3	4
KIF20B	KIF20B	0	0	0	0	0	0	0	0	0	0	4	0	0	0	0	1	2	0	0	3	0	0	1
WIZ	WIZ	0.45	0.26	0	0	7	0	8	4	8	7	13	12	7	5	2	8	7	2	0	5	1	0	3
FBL	FBL	0.79	0.55	0	0	9	4	12	6	4	5	12	13	6	6	3	9	9	10	2	10	2	0	6
MKI67	MKI67	1.19	0.83	0	0	253	126	128	126	144	98	215	284	214	147	78	140	167	82	79	208	66	50	138
RPS10	RPS10	0.56	0.33	0	0	0	2	4	0	4	0	3	8	0	0	3	1	0	0	1	1	2	2	1
UTP3	UTP3	0.88	0.77	0	0	16	7	10	12	15	11	17	15	5	4	0	0	0	1	0	0	0	0	0
RPS16	RPS16	0.78	0.27	0	0	1	3	2	0	12	2	2	1	3	2	6	7	7	4	2	6	2	3	9
RPS15	RPS15	1.3	0.87	0	0	53	131	53	55	112	67	117	61	0	0	5	0	1	1	2	3	3	1	5
NUMA1	NUMA1	1.08	0.08	0	0	9	7	8	2	11	6	9	11	110	87	32	54	92	16	24	110	28	22	70
SSRP1	SSRP1	1.3	0.96	0	0	10	10	7	2	5	11	8	15	1	4	0	0	0	1	0	1	0	0	0
KALRN	KALRN	0	0	0	0	0	0	1	0	0	0	0	0	0	0	0	0	0	0	0	0	0	0	0
LOC100289218	LOC100289218	0	0	0	0	0	0	0	0	0	0	1	0	0	0	0	0	0	0	0	0	0	0	0
CCDC25	CCDC25	0	0	0	0	0	0	0	0	0	1	1	1	2	2	0	0	0	3	1	0	0	0	1
KPNA2	KPNA2	0	0	0	0	0	0	0	0	1	0	0	0	0	0	2	1	2	1	4	6	2	0	5
CBX8	CBX8	0	0	0	0	0	0	0	0	0	0	2	0	1	1	1	0	1	0	1	1	1	0	1
IRS4	IRS4	1.16	0.03	0	0	1	0	0	0	0	0	0	2	0	0	43	49	40	46	12	33	15	23	46
HSPA1A	HSPA1A;HSPA1B	1.11	0.39	0	0	80	69	63	78	73	69	65	61	26	29	166	176	126	162	131	155	123	109	150
RPS25	RPS25	0.96	0.52	0	0	0	1	0	0	2	0	2	0	0	0	0	0	0	0	0	2	1	0	0
HIST1H2AH	HIST1H2AG;HIST1...	1.86	0.62	0	0	24	26	22	32	0	0	24	0	10	7	16	23	16	23	22	33	36	24	24
HIST1H2AJ	HIST1H2AJ	0	0	0	0	0	0	0	0	0	19	0	0	10	7	16	23	16	23	22	33	36	24	24
CACYBP	CACYBP	0.94	0.82	0	0	36	24	45	26	30	21	37	38	1	3	4	0	0	7	1	2	0	0	1
RP9	RP9	0	0	0	0	0	0	0	0	5	0	0	4	1	1	0	0	0	0	0	0	0	0	0
CACTIN	CACTIN	1.18	1.06	0	0	98	109	77	72	111	81	93	127	5	3	4	2	1	4	2	2	3	2	1
MYO6	MYO6	2.75	0.42	0	0	0	3	0	0	0	0	0	0	0	0	2	1	3	3	2	5	1	2	3
U2AF2	U2AF2	0.57	0.3	0	0	4	0	3	1	0	3	11	7	0	0	0	0	2	0	0	0	0	0	0
OSCP1	OSCP1	1.47	1.35	0	0	1	0	0	0	0	0	0	0	0	0	0	0	0	0	0	0	0	0	0
SCRIB	SCRIB	0	0	0	0	0	0	0	2	0	0	3	2	19	12	9	5	3	5	8	6	12	11	8
SRP54	SRP54	0.87	0.57	0	0	13	10	21	7	32	10	6	6	0	0	1	0	0	4	1	0	1	0	0
RPS20	RPS20	0.63	0.58	0	0	5	5	9	5	9	8	10	13	4	3	5	4	6	5	4	5	2	3	5
HCFC1	HCFC1	0.98	0.9	0	0	83	98	102	92	107	84	91	108	48	41	42	43	39	43	28	59	17	15	39
CAND1	CAND1	1.58	0.13	0	0	0	1	0	0	0	0	0	0	0	0	9	6	1	5	6	13	4	8	5
LSM12	LSM12	0	0	0	0	0	0	0	0	0	0	1	0	0	0	4	2	3	2	1	3	0	0	5
RPS19BP1	RPS19BP1	0	0	0	0	0	0	0	0	0	0	1	0	0	0	0	0	0	0	0	0	0	0	0
GLI2	GLI2	0	0	0	0	0	0	0	0	0	0	3	0	0	0	0	0	0	0	0	0	0	0	0
CREB3L1	CREB3L1	0	0	0	0	0	0	0	6	0	0	0	0	0	0	0	0	0	0	0	0	0	0	0
PXN	PXN	0.9	0.36	0	0	6	1	6	0	6	1	3	9	2	3	4	1	1	12	3	0	4	3	2
DGKB	DGKB	0	0	0	0	0	0	0	1	0	0	0	0	0	0	0	0	0	0	0	0	0	0	0
MICAL3	MICAL3	0.89	0.6	0	0	0	1	0	2	0	0	0	3	0	0	0	0	0	0	0	0	0	0	0
MTA2	MTA2	0.72	0.19	0	0	9	0	6	7	7	3	4	11	4	5	10	11	12	3	10	16	8	9	14
SIN3A	SIN3A	0	0	0	0	0	0	0	0	0	0	0	3	9	9	12	8	11	2	3	13	2	4	14
PLS3	PLS3	0.83	0.63	0	0	3	8	6	9	10	6	7	6	0	0	0	0	0	1	0	1	0	0	0
ESF1	ESF1	0.65	0.18	0	0	4	0	1	1	2	0	9	10	14	9	8	3	3	4	3	5	3	3	3
SCAF11	SCAF11	2.28	0.17	0	0	0	4	0	0	0	1	0	2	20	13	4	1	2	0	0	2	0	0	1
DKFZP434K085	DKFZP434K085	1.58	1.43	0	0	0	1	0	0	0	0	0	0	0	0	0	0	0	0	0	0	0	0	0
ANLN	ANLN	0.95	0.47	0	0	2	3	0	2	0	3	7	6	8	4	0	0	0	0	0	0	0	0	0
ORC2	ORC2	0	0	0	0	0	0	0	4	0	0	0	0	14	16	21	17	9	14	8	8	8	11	6
PTGIS	PTGIS	0	0	0	0	0	0	3	0	0	0	0	0	0	0	0	0	0	0	0	0	0	0	0
MAP7D3	MAP7D3	0.82	0.16	0	0	0	3	0	0	0	0	4	13	13	7	8	2	3	4	9	0	1	8	4
CLIP2	CLIP2	0	0	0	0	0	0	0	3	0	0	0	0	0	0	0	0	0	0	0	0	0	0	0
USP10	USP10	1.16	1.01	0	0	99	116	77	105	94	100	87	117	3	3	3	2	1	2	3	2	1	1	1
USP16	USP16	0	0	0	0	0	0	0	0	0	0	3	1	0	0	4	2	3	3	3	0	3	3	1
LUZP1	LUZP1	1.37	0.36	0	0	10	5	6	0	4	0	10	15	28	21	9	5	4	7	4	5	1	1	6
WASHC2C	WASHC2C	0	0	0	0	0	0	0	0	0	3	0	0	0	0	0	0	0	0	0	0	0	0	0
DACH1	DACH1	1.26	0.85	0	0	3	3	1	2	0	3	3	5	0	0	3	1	0	2	2	4	1	0	2
MPHOSPH10	MPHOSPH10	1.03	0.71	0	0	5	7	4	0	7	7	8	13	8	7	0	0	0	0	0	0	0	0	0
DENND1A	DENND1A	0	0	0	0	0	0	0	0	0	0	0	6	0	0	0	0	0	0	0	0	0	0	0
NPM1	NPM1	1.3	0.45	0	0	75	66	54	55	57	50	59	61	147	148	100	112	53	120	78	118	46	45	61
OLA1	OLA1	0	0	0	0	0	0	0	0	0	0	0	2	0	0	0	0	0	1	0	1	0	0	0
SNRPE	SNRPE	1.06	0.86	0	0	14	23	17	16	16	25	19	17	1	1	2	1	2	1	3	3	1	2	0
RCC1	RCC1	0	0	0	0	0	0	0	0	0	0	3	2	3	3	0	0	0	0	0	0	0	0	0
RCC2	RCC2	0	0	0	0	0	0	0	0	0	0	5	0	1	2	5	9	3	6	1	13	1	2	7
DIS3	DIS3	0.66	0.41	0	0	3	4	6	3	2	0	14	15	0	0	0	1	0	1	0	0	1	0	1
RPL26L1	RPL26L1	0	0	0	0	0	0	0	4	0	0	0	0	0	0	10	4	5	1	2	3	1	2	2
ESR1	ESR1	0	0	0	0	0	0	2	0	0	0	0	0	0	0	0	0	0	0	0	0	0	0	0
GTPBP2	GTPBP2	0	0	0	0	0	0	0	2	0	0	0	0	0	0	0	0	0	0	0	0	0	0	0
RPL36	RPL36	0.95	0.64	0	0	22	39	29	26	69	41	24	13	0	0	1	0	1	0	0	0	0	0	0
RPL37	RPL37	0.84	0.45	0	0	0	3	2	3	2	2	4	0	0	0	1	0	1	0	0	0	3	2	1
RNF169	RNF169	0	0	0	0	0	0	0	0	0	1	13	10	0	0	1	0	0	0	0	1	0	0	0
RPL35	RPL35	0.78	0.71	0	0	31	26	43	33	43	33	37	37	0	0	1	0	0	0	0	1	3	1	1
SLC4A1AP	SLC4A1AP	0	0	0	0	0	0	0	0	0	0	6	4	2	0	1	0	0	1	0	1	1	1	2
SNRPC	SNRPC	1.47	0.3	0	0	1	0	0	0	0	0	0	0	0	1	1	0	1	0	3	1	2	3	0
C11ORF58	C11ORF58	0	0	0	0	0	0	0	0	7	3	0	0	0	0	0	0	0	0	0	0	0	0	0
G3BP1	G3BP1	0.99	0.85	0	0	69	55	58	61	84	35	64	97	8	7	18	16	10	11	13	6	10	10	12
DGCR14	DGCR14	0	0	0	0	0	0	0	0	0	0	0	5	1	1	0	0	0	0	0	0	0	0	0
ALKBH5	ALKBH5	0	0	0	0	0	0	2	1	0	0	0	3	0	0	0	0	0	1	0	1	0	0	0
G3BP2	G3BP2	1.1	0.75	0	0	7	4	4	0	5	2	11	10	2	1	2	3	0	1	1	0	2	1	0
DNM1L	DNM1L	0.46	0.11	0	0	0	1	0	3	4	6	0	0	1	1	7	2	1	13	9	10	4	8	5
MYO7B	MYO7B	0	0	0	0	0	0	0	0	0	0	1	0	0	0	0	0	0	0	0	0	0	0	0
2017-09-02	2017-09-02	0	0	0	0	0	0	0	0	0	0	1	0	0	0	0	0	0	0	0	0	0	0	0
DDX50	DDX50	0.73	0.24	0	0	2	1	0	0	0	3	5	8	2	2	9	5	7	8	6	10	3	5	7
SPATA5	SPATA5	1.33	0.85	0	0	1	1	0	2	1	0	0	0	0	0	0	0	0	0	0	1	0	0	0
SCAF1	SCAF1	0	0	0	0	0	0	0	0	3	0	0	0	3	0	0	0	0	0	0	1	0	0	0
